# Supplementary material for: Tuning the Emission of Cationic Iridium (III) Complexes Towards the Red Through Methoxy Substitution of the Cyclometalating Ligand
Source: PubMed Central journal article supplement (PMC4648437; doi:10.1038/srep12325), 2015-07-16
Supplement: srep12325-s1.pdf [file srep12325-s1.pdf]

# Tuning the Emission of Cationic Iridium (III) Complexes Towards the Red Through Methoxy Substitution of the Cyclometalating Ligand

Kamrul Hasan,<sup>a</sup> Ashu K. Bansal,<sup>b</sup> Ifor D.W. Samuel,<sup>b</sup> Cristina Roldán-Carmona,<sup>c,d</sup> Henk Bolink<sup>c\*</sup> and Eli Zysman-Colman<sup>e\*</sup>

<sup>a</sup> *Département de Chimie, Université de Sherbrooke, 2500 Boul. de l'Université, Sherbrooke, QC, Canada, J1K 2R1*

<sup>b</sup> *Organic Semiconductor Centre, SUPA School of Physics and Astronomy, University of St. Andrews, North Haugh, St. Andrews, Fife, UK, KY16 9SS*

<sup>c</sup> *Instituto de Ciencia Molecular, Universidad de Valencia, C/ Catedrático J. Beltrán 2, 46980 Paterna (Valencia), Spain. [henk.bolink@uv.es](mailto:henk.bolink@uv.es)*

<sup>d</sup> *Department of Physical Chemistry and Applied Thermodynamics, Campus Rabanales, Ed. C3, University of Cordoba, 14014, Spain*

<sup>e</sup> *Organic Semiconductor Centre, EaStCHEM School of Chemistry, University of St Andrews, St Andrews, Fife, UK, KY16 9ST, Fax: +44-1334 463808; Tel: +44-1334 463826; E-mail: [eli.zysman-colman@st-andrews.ac.uk](mailto:eli.zysman-colman@st-andrews.ac.uk); URL: <http://www.zysman-colman.com>*

## SUPPORTING INFORMATION

### Table of contents:

|                                                                                       | <b>Pages</b> |
|---------------------------------------------------------------------------------------|--------------|
| <sup>1</sup> H and <sup>13</sup> C NMR spectrum of individual compounds and complexes | S2-S23       |
| Synthesis of ligands                                                                  | S24          |
| Tables of electrochemical and UV-Visible absorption data                              | S24-S25      |
| UV-vis and emission spectra of individual complexes                                   | S26-S29      |
| Cyclic voltammograms of individual complexes                                          | S30-S33      |
| TDDFT UV-Vis absorption spectra predictions                                           | S34-S37      |
| Performance of LEECs fabricated with <b>1a</b> – <b>4b</b> complexes                  | S38          |
| References                                                                            | S38          |

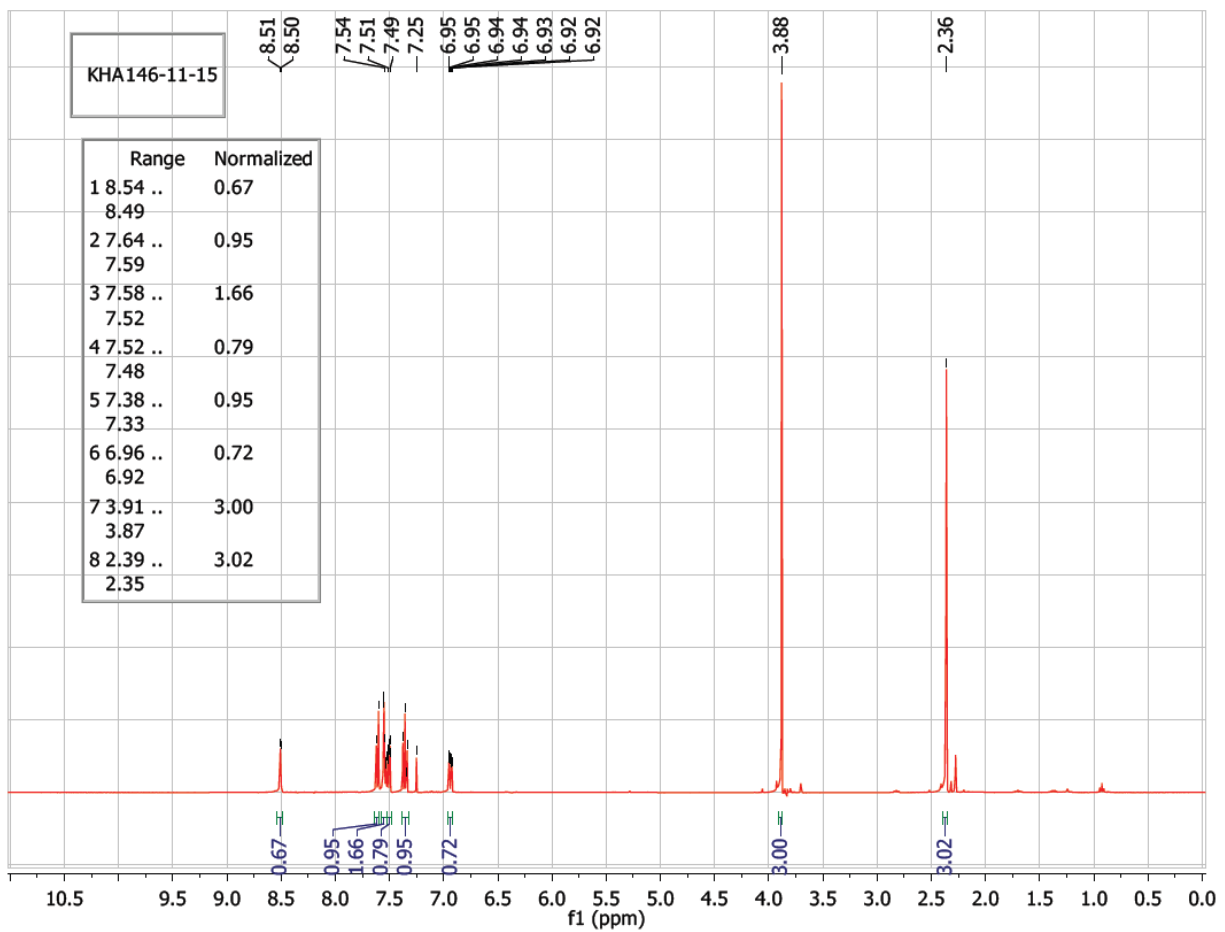

Figure S1. <sup>1</sup>H NMR spectrum of 2-(3'-Methoxyphenyl)-5-methylpyridine (3-MeOppy) in CDCl<sub>3</sub>

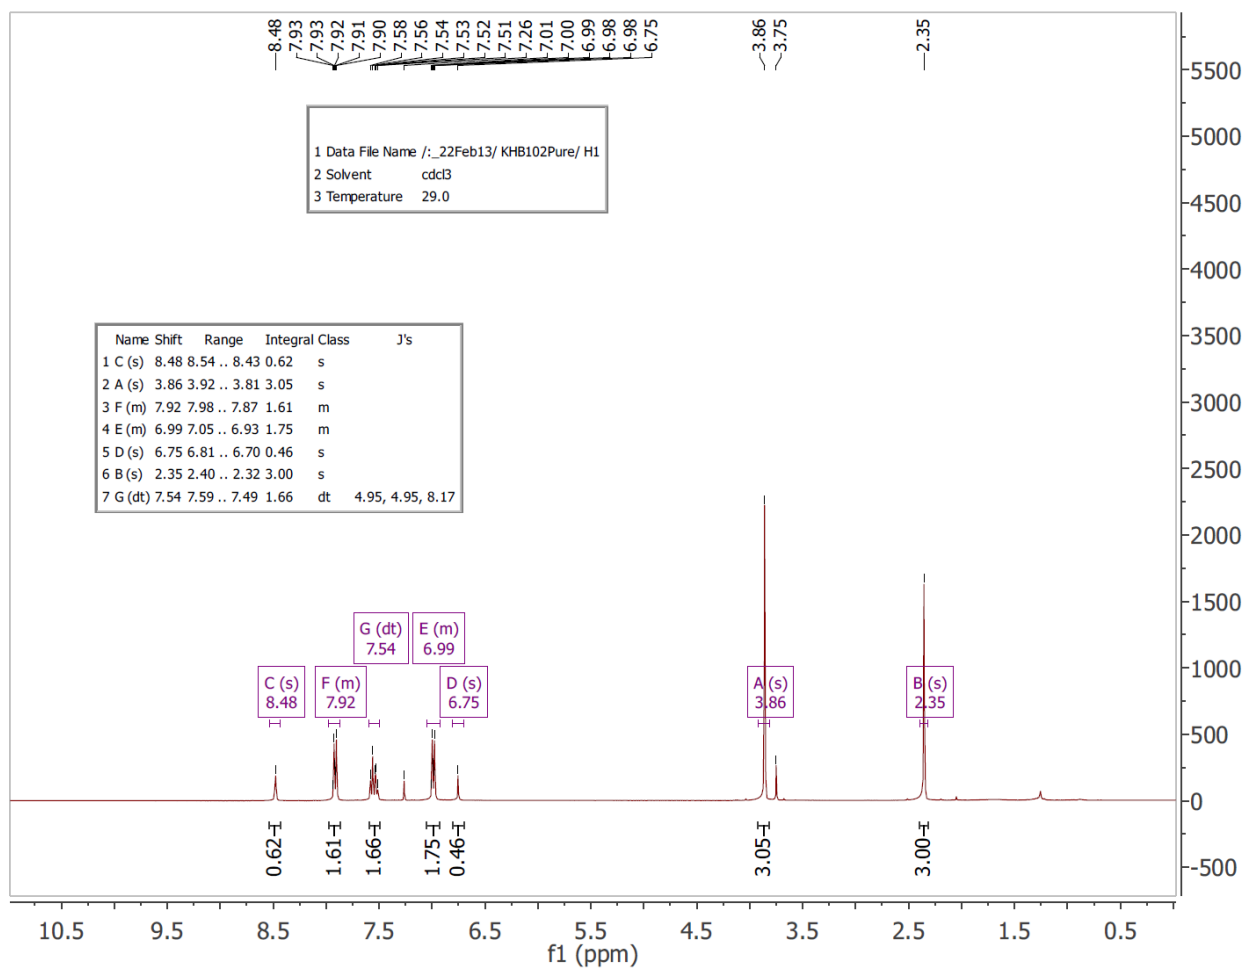

Figure S2. <sup>1</sup>H NMR spectrum of 2-(4'-Methoxyphenyl)-5-methylpyridine (4-MeOppy) in CDCl<sub>3</sub>

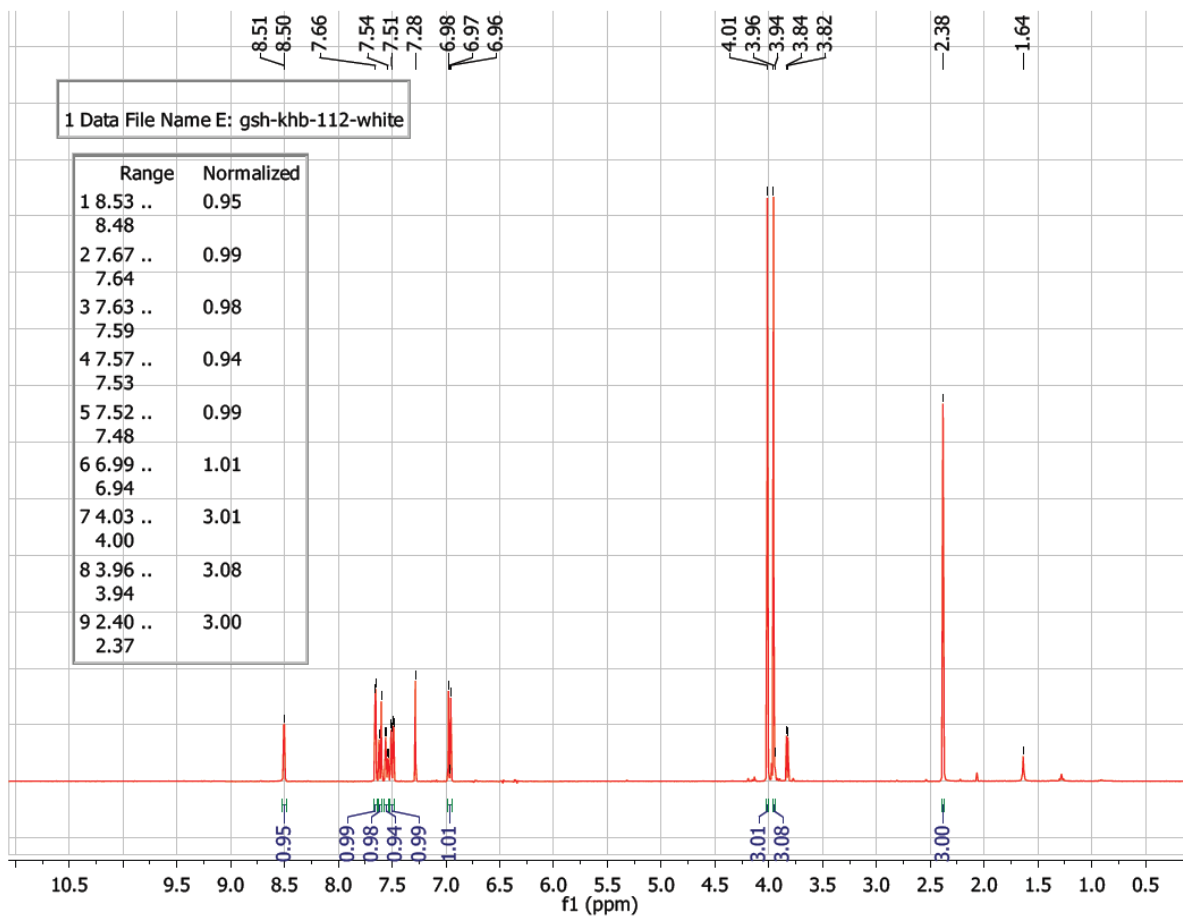

Figure S3.  $^1\text{H}$  NMR spectrum of 2-(3',4'-Dimethoxyphenyl)-5-methylpyridine (3,4-dMeOppy) in  $\text{CDCl}_3$

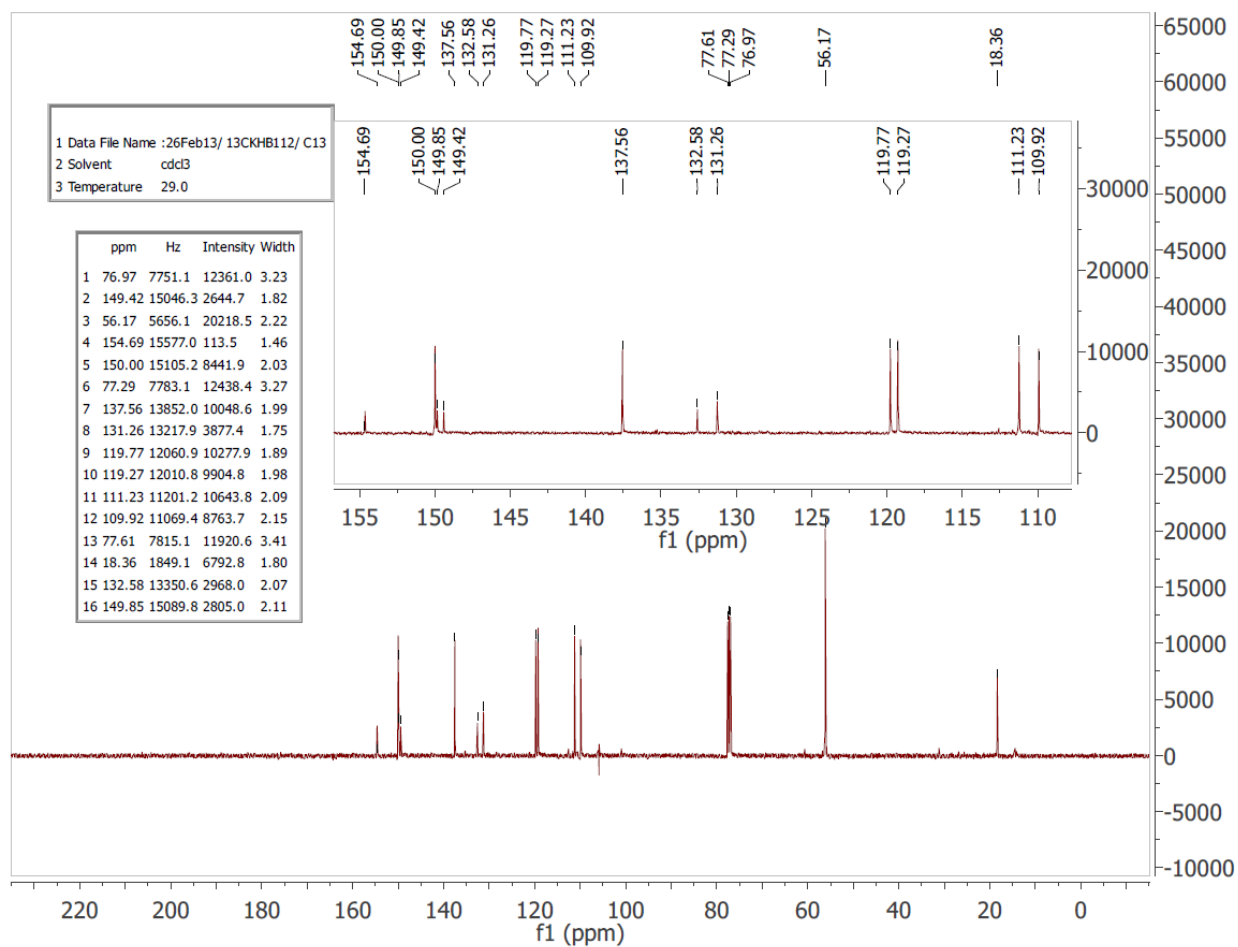

Figure S4. <sup>13</sup>C NMR spectrum of 2-(3',4'-Dimethoxyphenyl)-5-methylpyridine (3,4-dMeOppy) in CDCl<sub>3</sub>

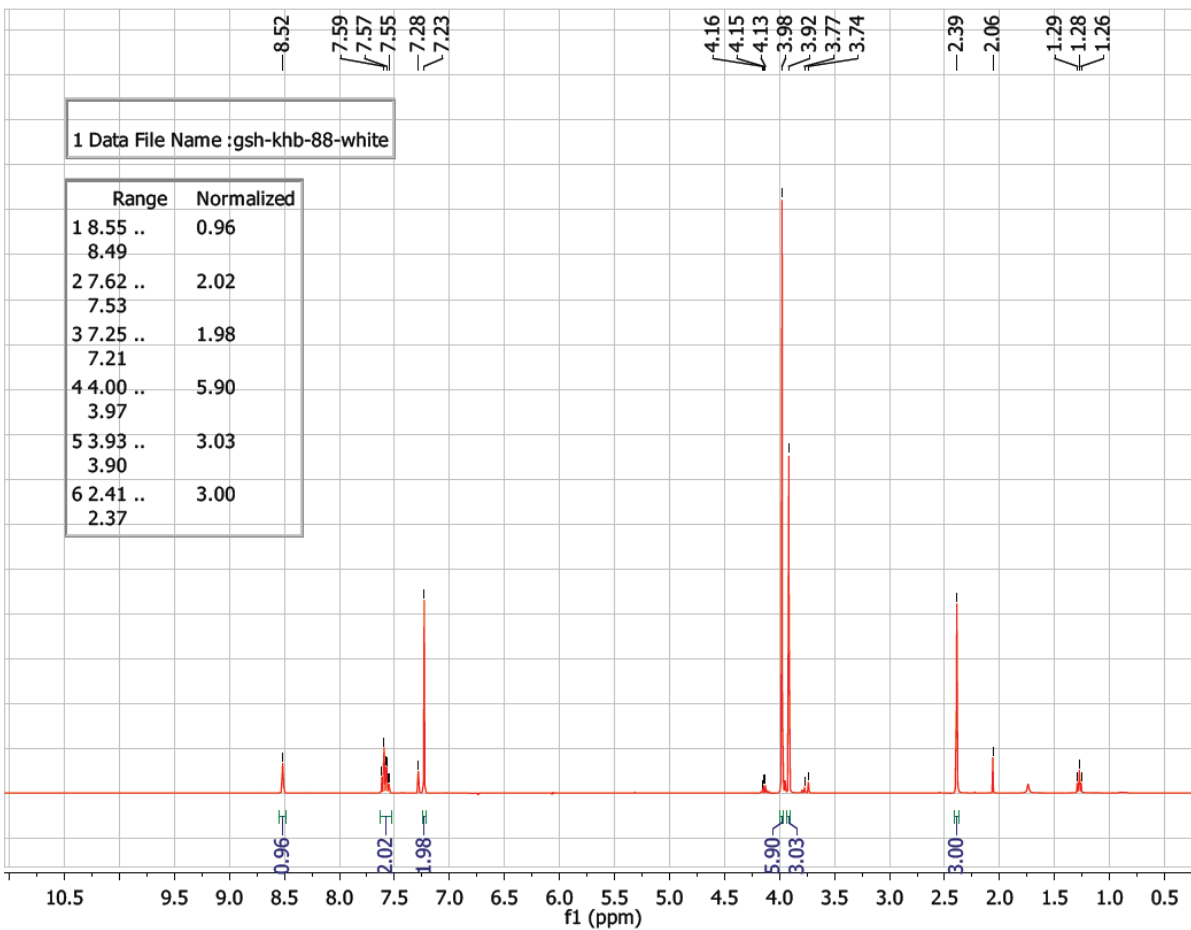

Figure S5. <sup>1</sup>H NMR spectrum of 2-(3',4',5'-Trimethoxyphenyl)-5-methylpyridine (3,4,5-tMeOppy) in CDCl<sub>3</sub>

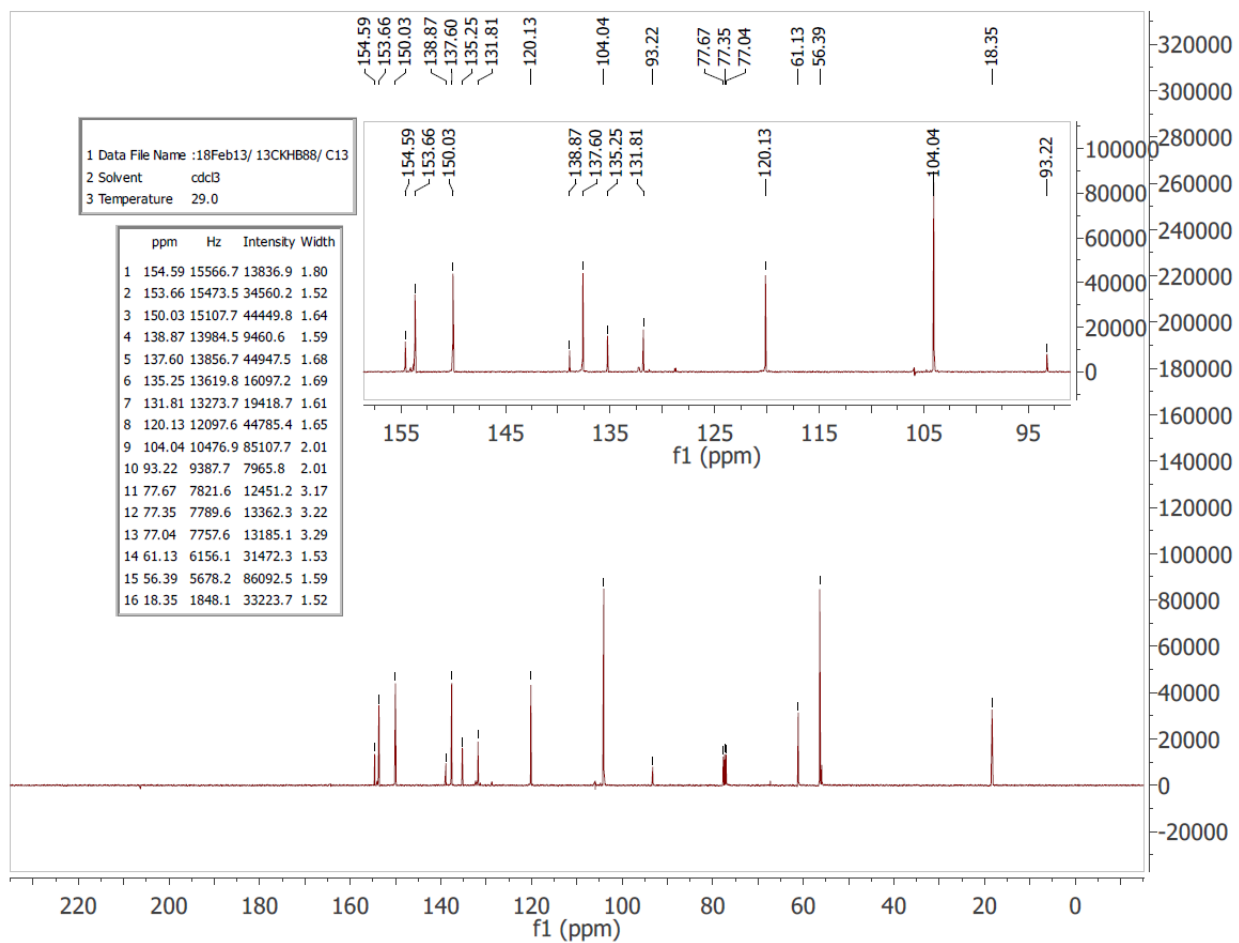

Figure S6.  $^{13}\text{C}$  NMR spectrum of 2-(3',4',5'-Trimethoxyphenyl)-5-methylpyridine (3,4,5-tMeOppy) in  $\text{CDCl}_3$

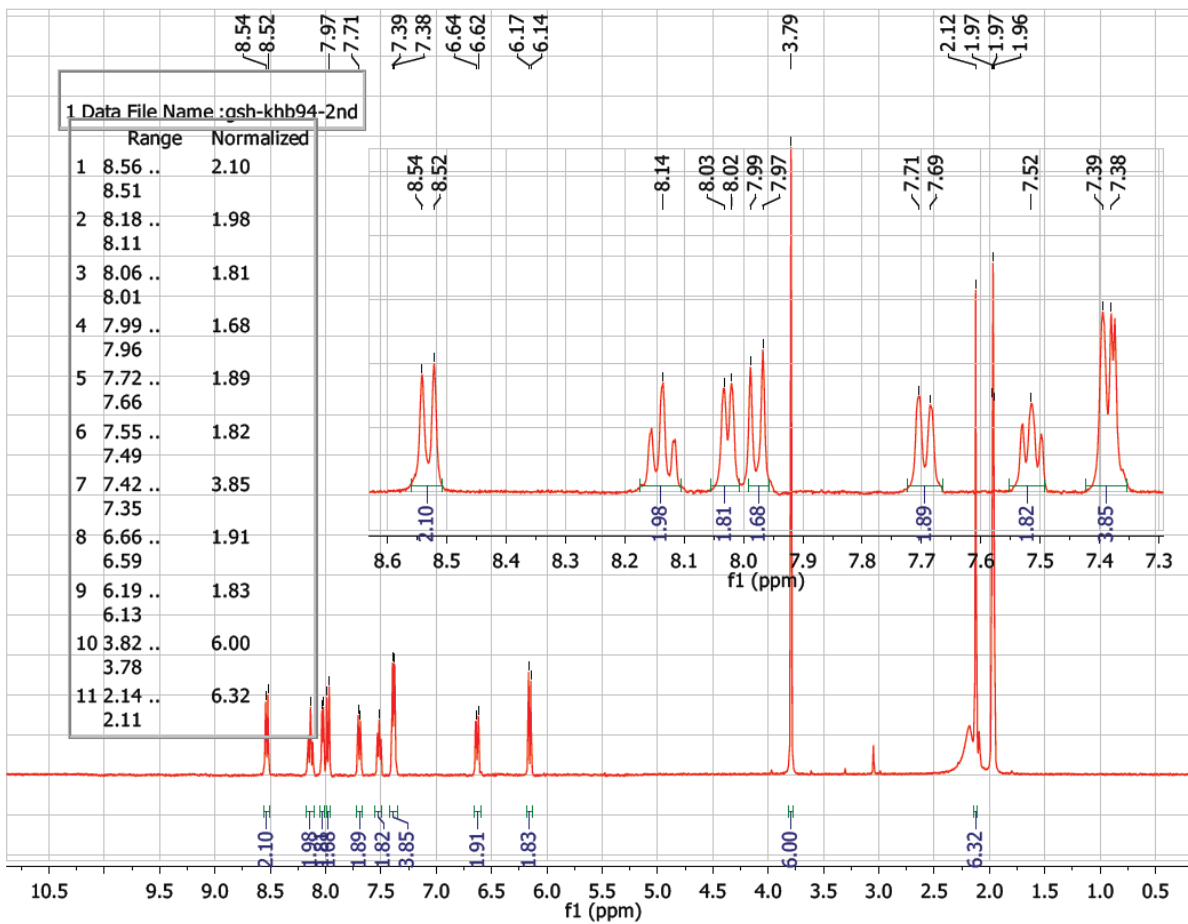

Figure S7.  $^1\text{H}$  NMR spectrum of  $[\text{Ir}(\text{3-MeOppy})_2(\text{bpy})](\text{PF}_6)$  **1a** in  $\text{CD}_3\text{CN}$



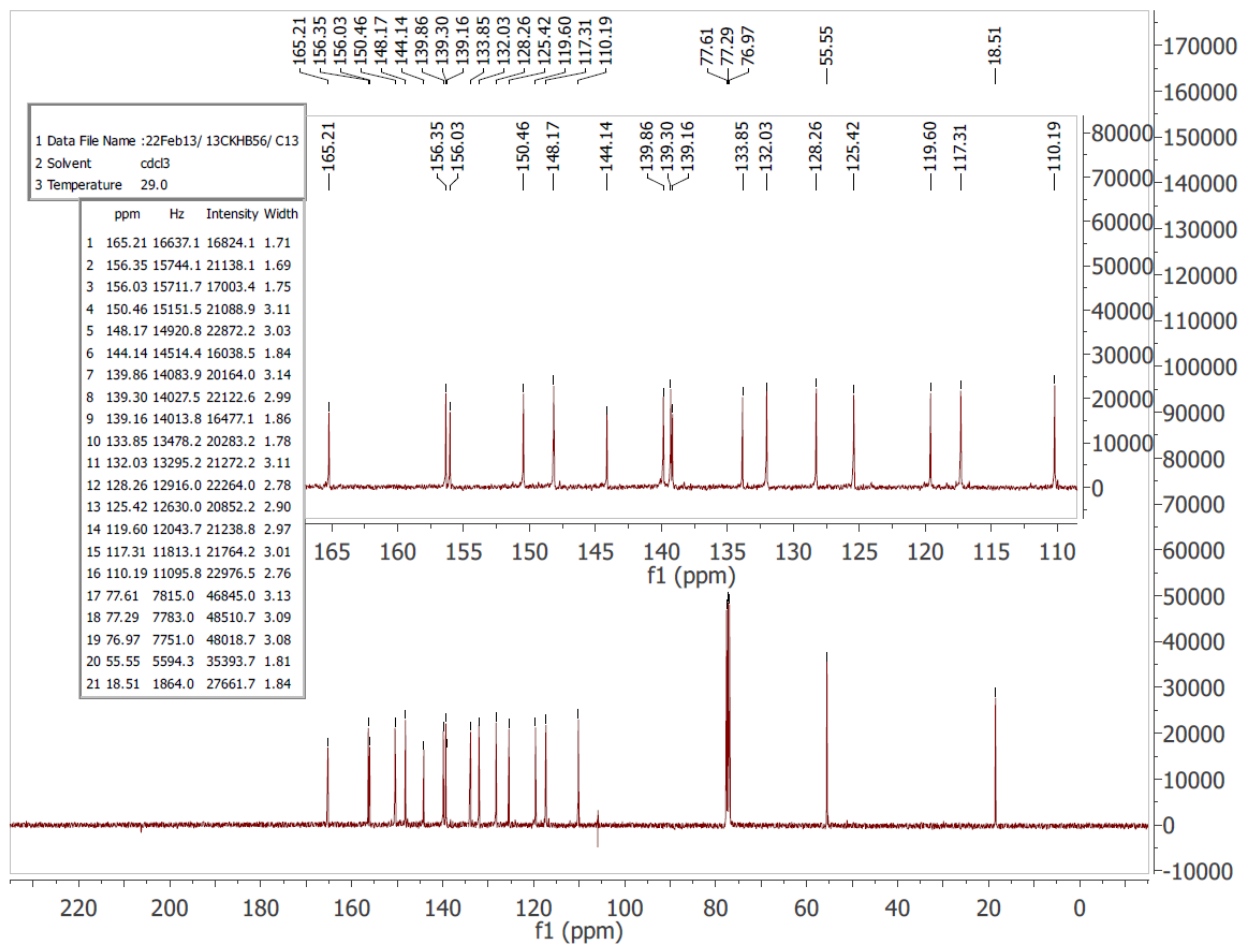

Figure S8. <sup>13</sup>C NMR spectrum of [Ir(3-MeOppy)<sub>2</sub>(bpy)](PF<sub>6</sub>) 1a in CDCl<sub>3</sub>

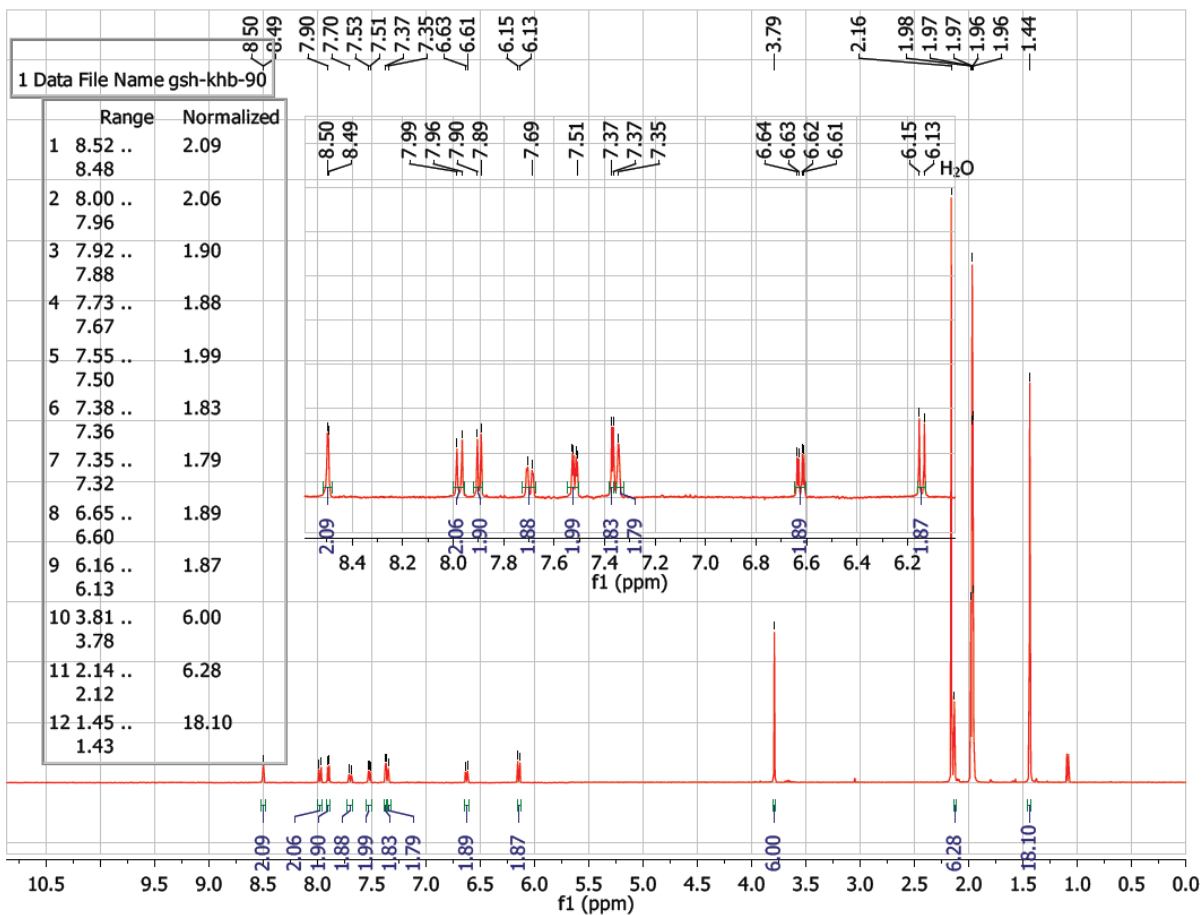

Figure S9.  $^1\text{H}$  NMR spectrum of  $[\text{Ir}(\text{3-MeO-ppy})_2(\text{dtbbpy})](\text{PF}_6)$  **1b** in  $\text{CD}_3\text{CN}$

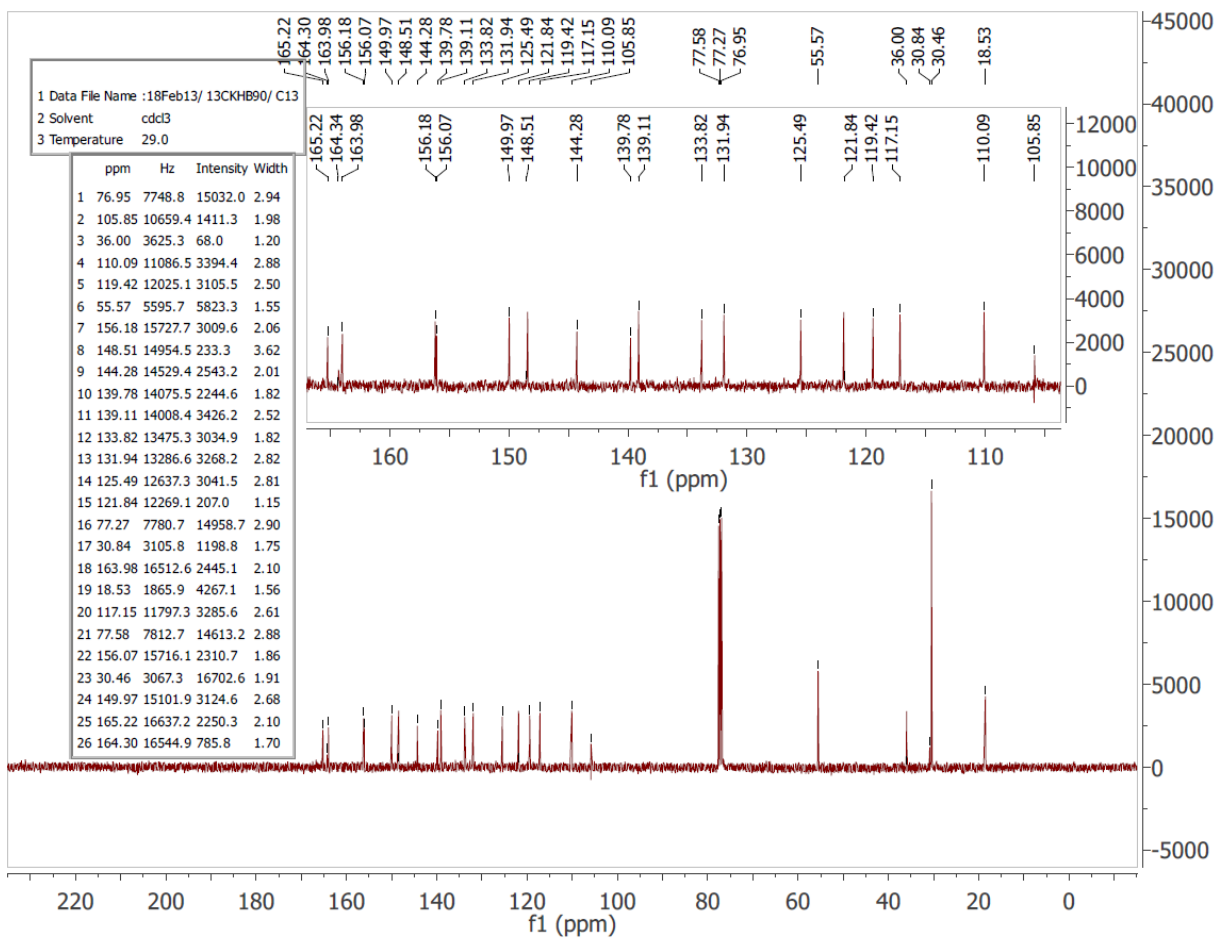

Figure S10.  $^{13}\text{C}$  NMR spectrum of  $[\text{Ir}(\text{3-MeO-ppy})_2(\text{dtbubpy})](\text{PF}_6)$  **1b** in  $\text{CDCl}_3$

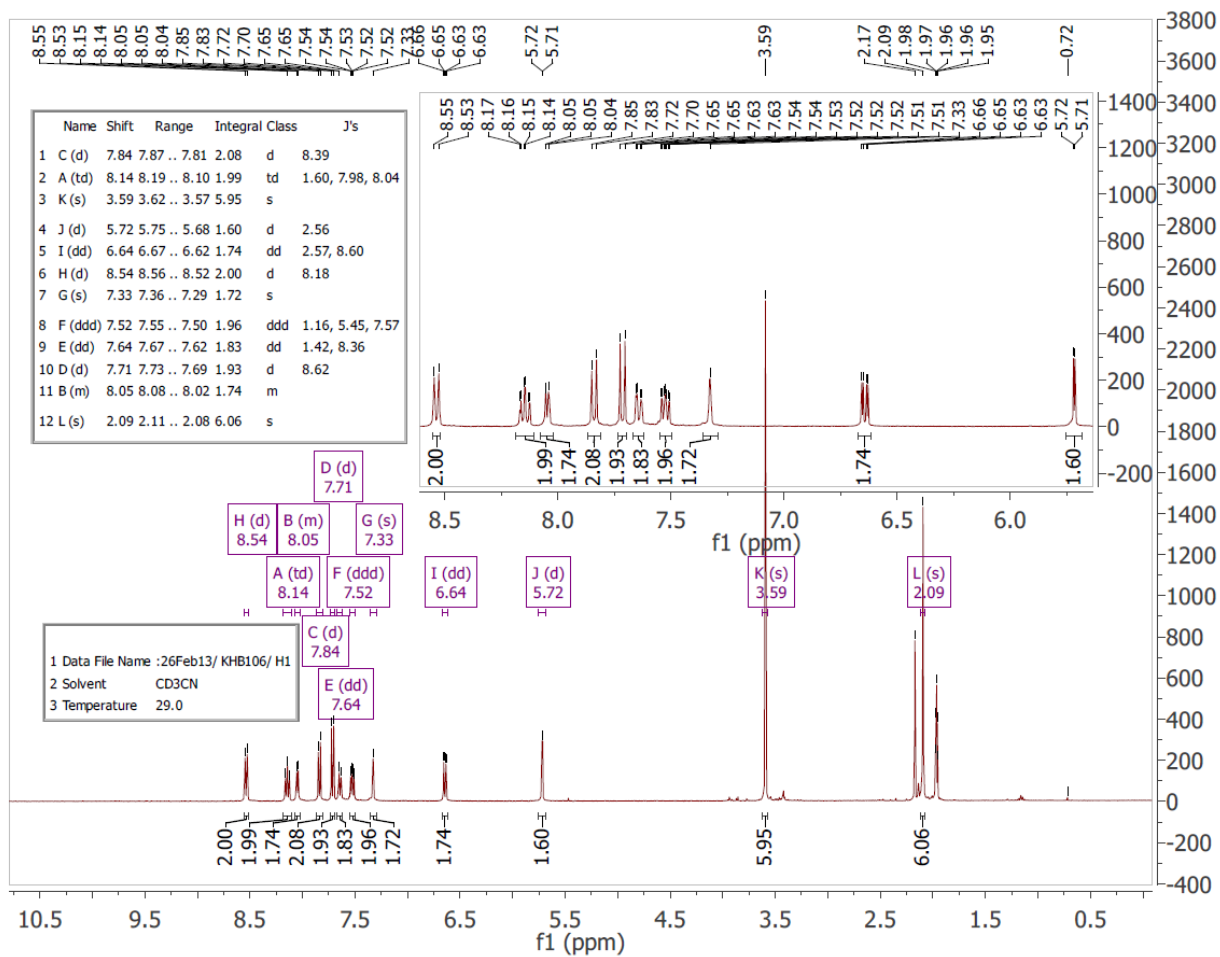

Figure S11.  $^1\text{H}$  NMR spectrum of  $[\text{Ir}(\text{4-MeOppy})_2(\text{bpy})](\text{PF}_6)_2$  **2a** in  $\text{CD}_3\text{CN}$

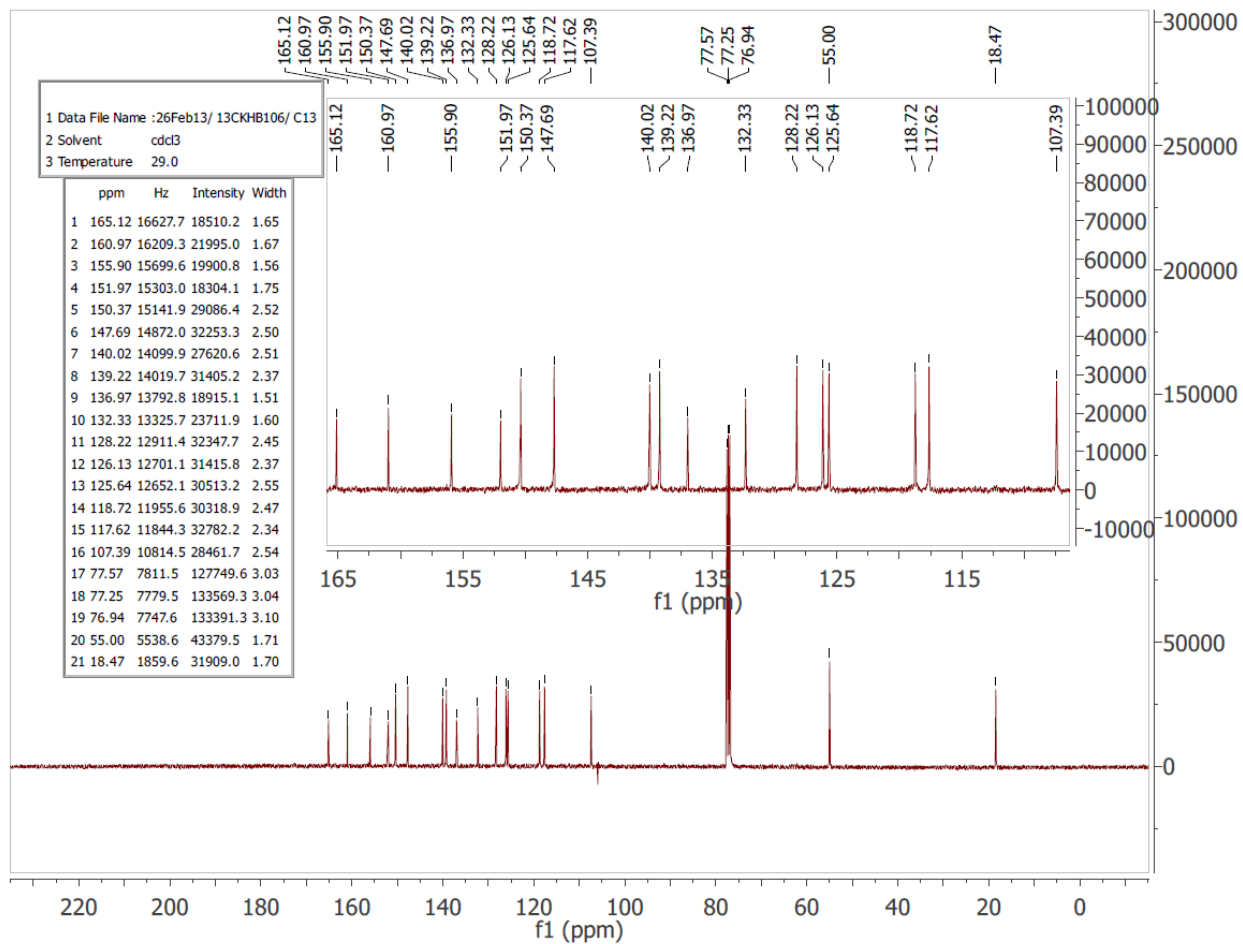

Figure S12.  $^{13}\text{C}$  NMR spectrum of  $[\text{Ir}(\text{4-MeOppy})_2(\text{bpy})](\text{PF}_6)$  2a in  $\text{CDCl}_3$

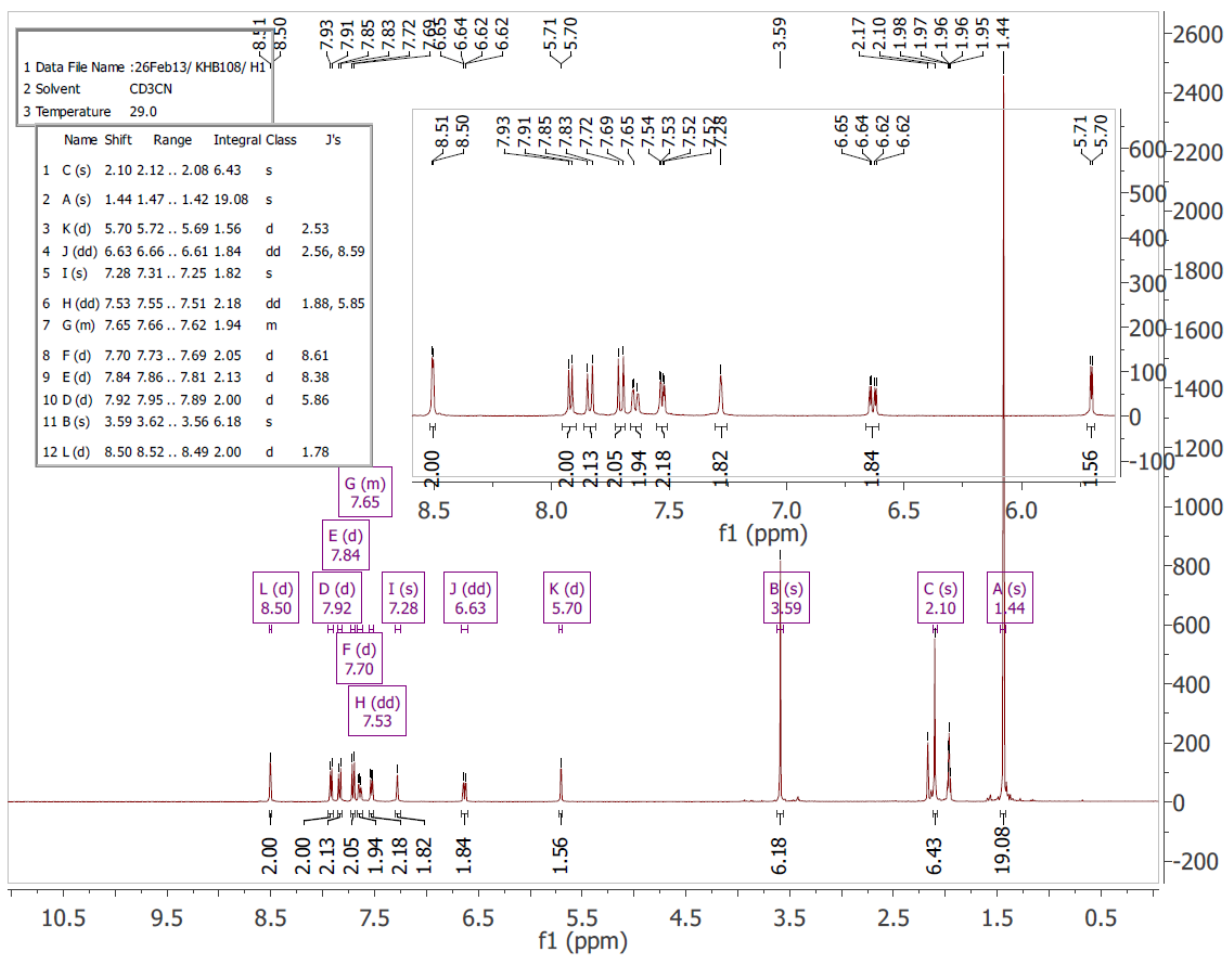

Figure S13.  $^1\text{H}$  NMR spectrum of  $[\text{Ir}(\text{4-MeOppy})_2(\text{dtubupy})](\text{PF}_6)$  **2b** in  $\text{CD}_3\text{CN}$

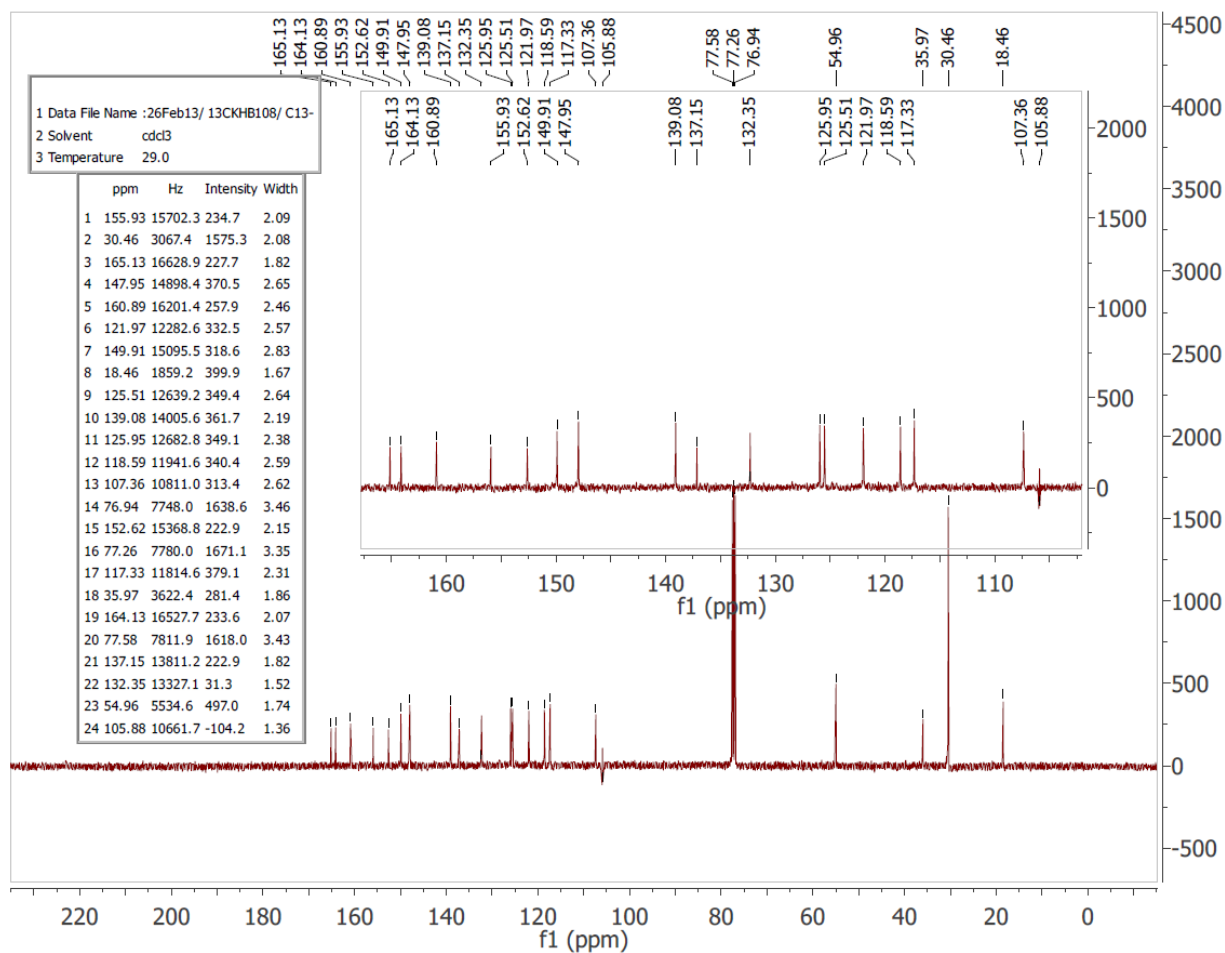

Figure S14.  $^{13}\text{C}$  NMR spectrum of  $[\text{Ir}(4\text{-MeOppy})_2(\text{dtubupy})](\text{PF}_6)$  **2b** in  $\text{CDCl}_3$

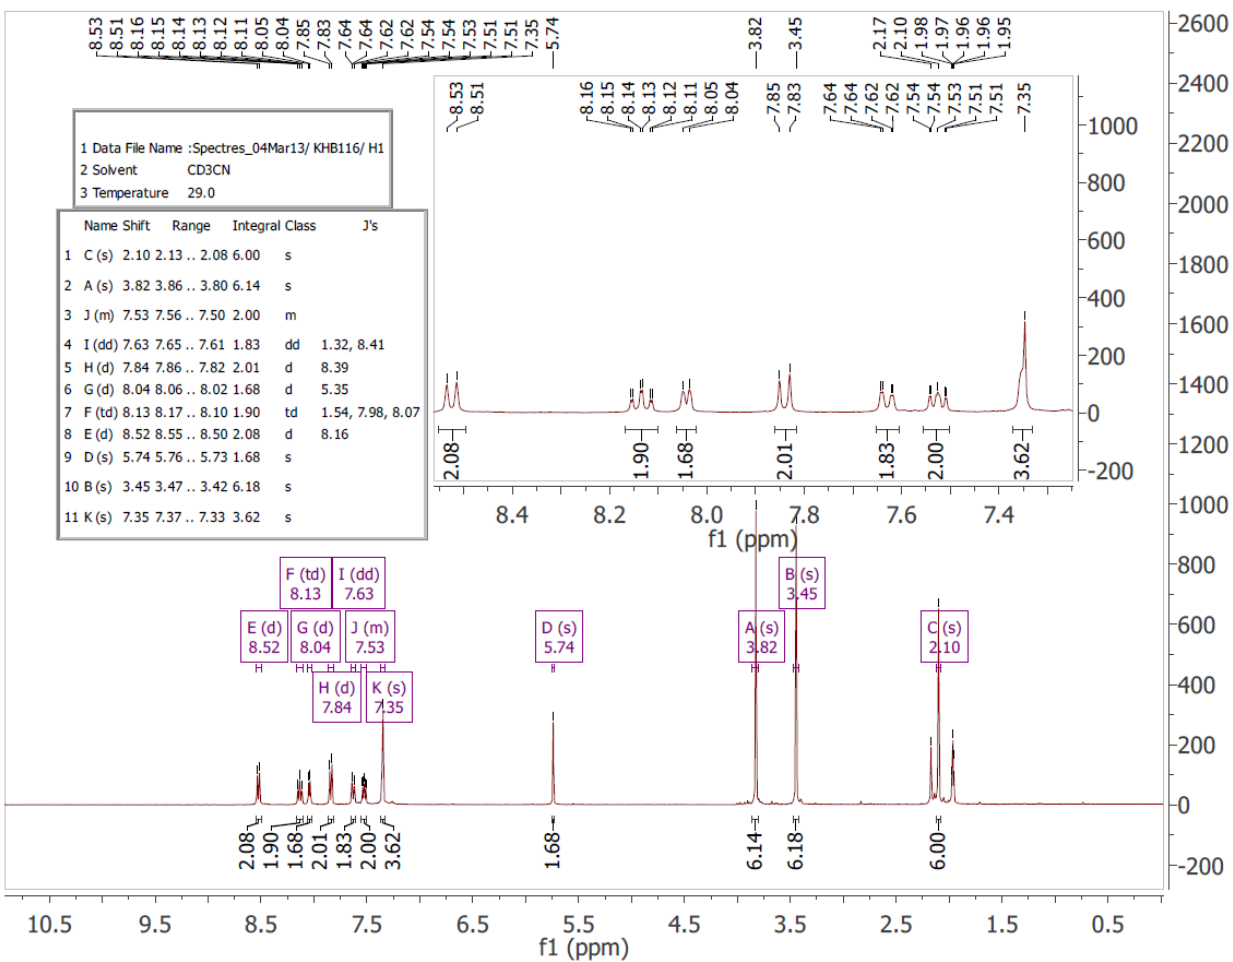

Figure S15.  $^1\text{H}$  NMR spectrum of  $[\text{Ir}(\text{3,4-dMeOppy})_2(\text{bpy})](\text{PF}_6)$  **3a** in  $\text{CD}_3\text{CN}$



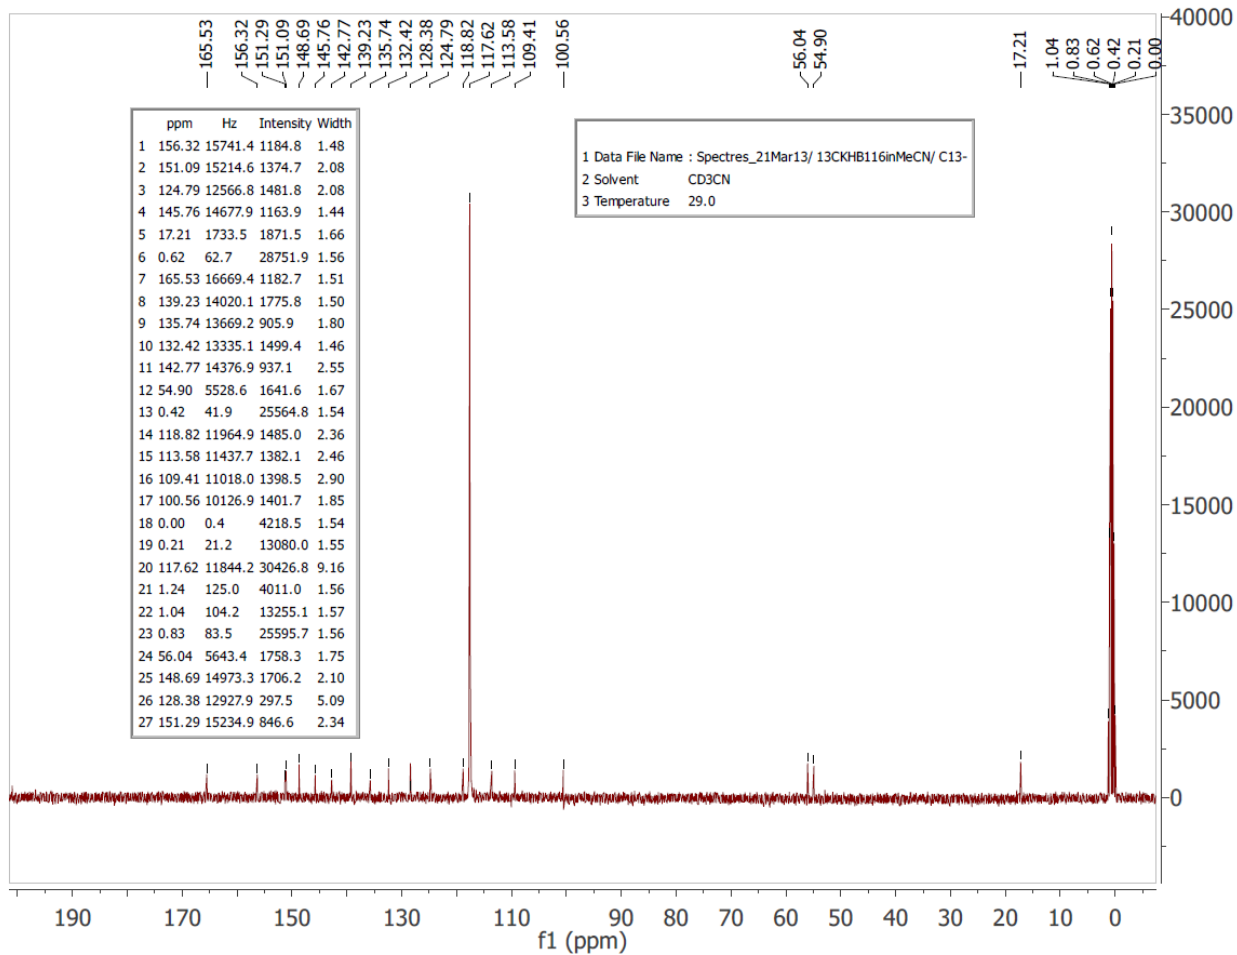

Figure S16.  $^{13}\text{C}$  NMR spectrum of  $[\text{Ir}(\text{3,4-dMeOppy})_2(\text{bpy})](\text{PF}_6)$  **3a** in  $\text{CD}_3\text{CN}$

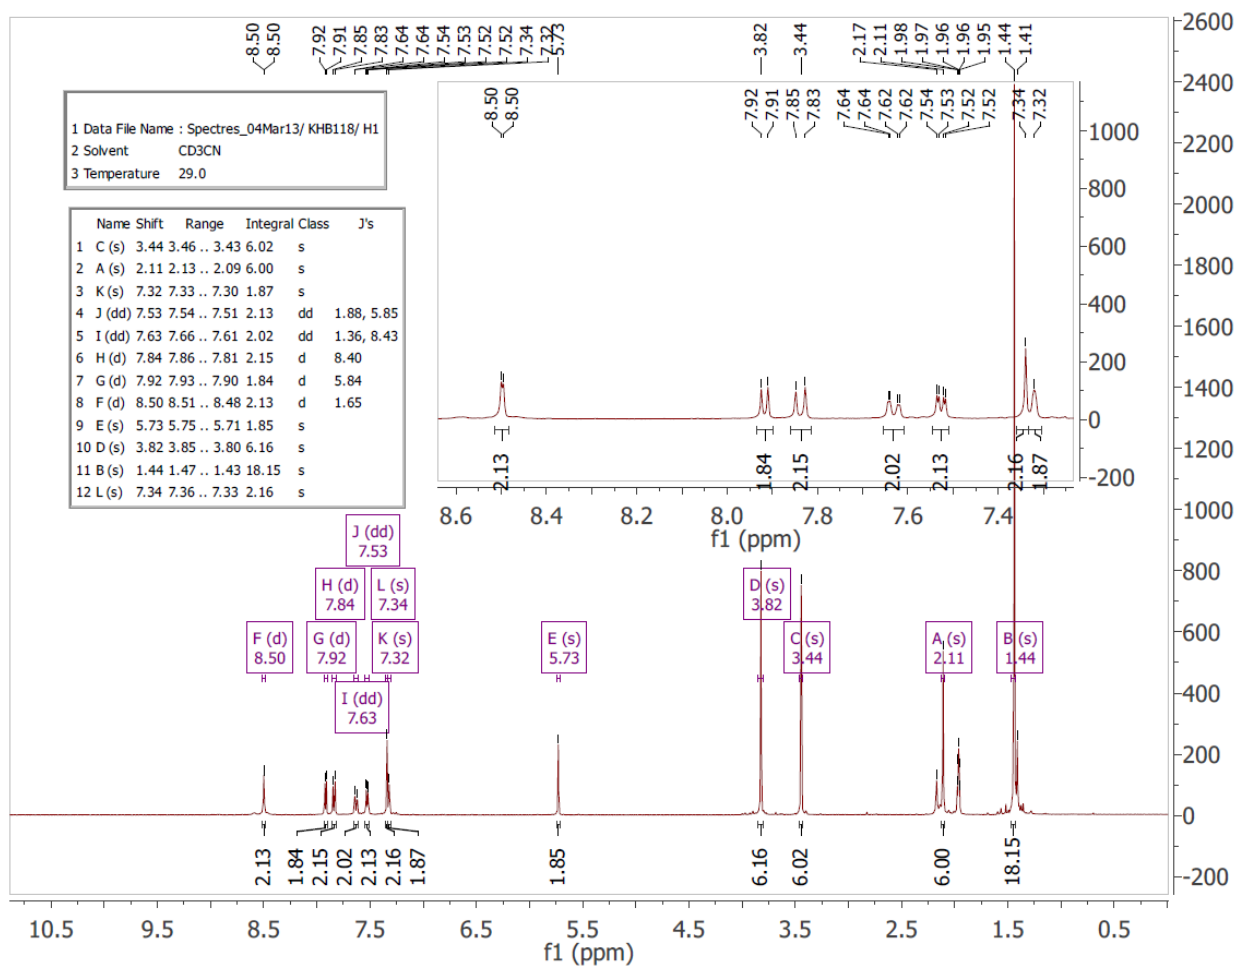

Figure S17. <sup>1</sup>H NMR spectrum of [Ir(3,4-dMeOppy)<sub>2</sub>(dtbubpy)](PF<sub>6</sub>) **3b** in CD<sub>3</sub>CN

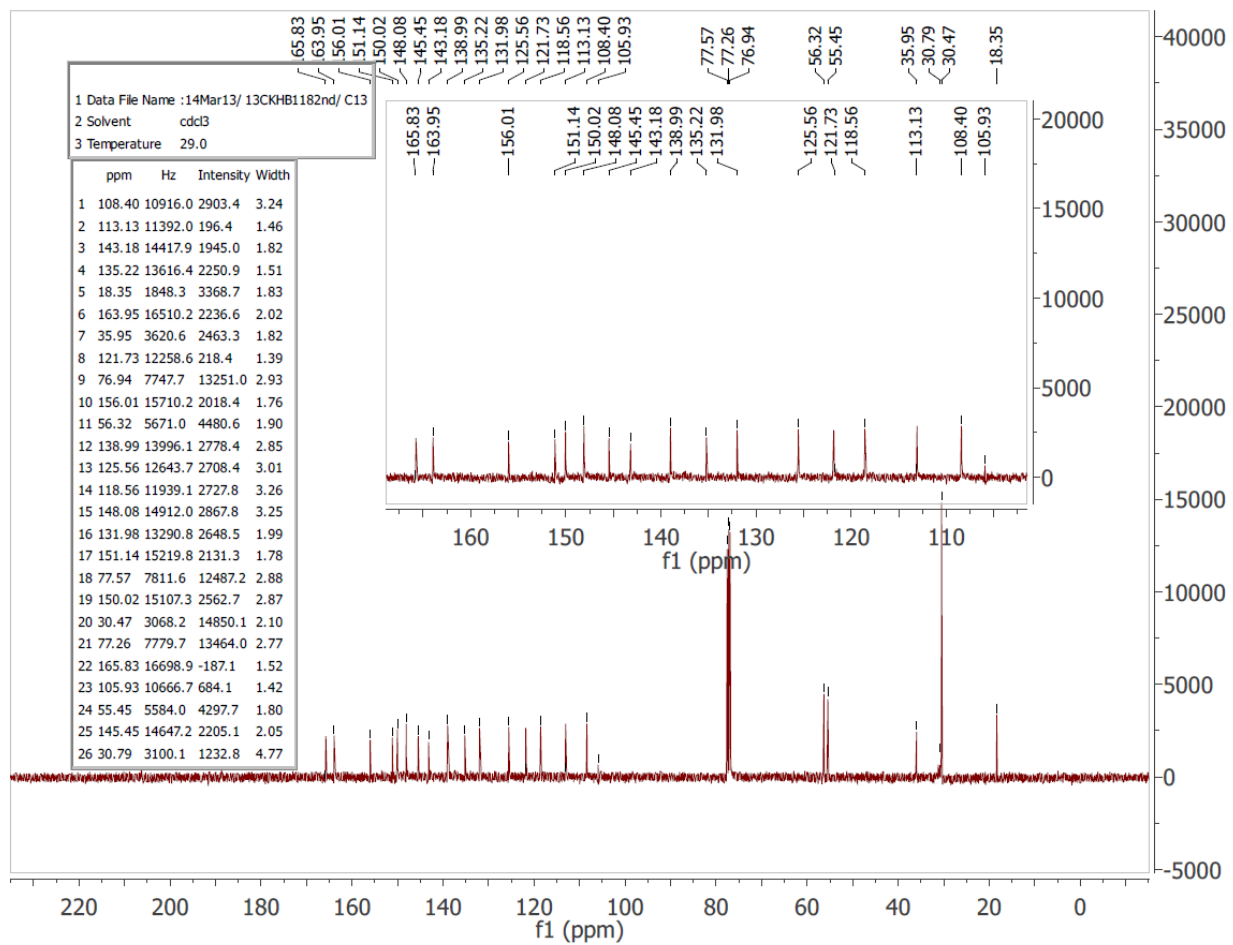

Figure S18.  $^{13}\text{C}$  NMR spectrum of  $[\text{Ir}(\text{3,4-dMeOppy})_2(\text{dtubupy})](\text{PF}_6)$  **3b** in  $\text{CDCl}_3$

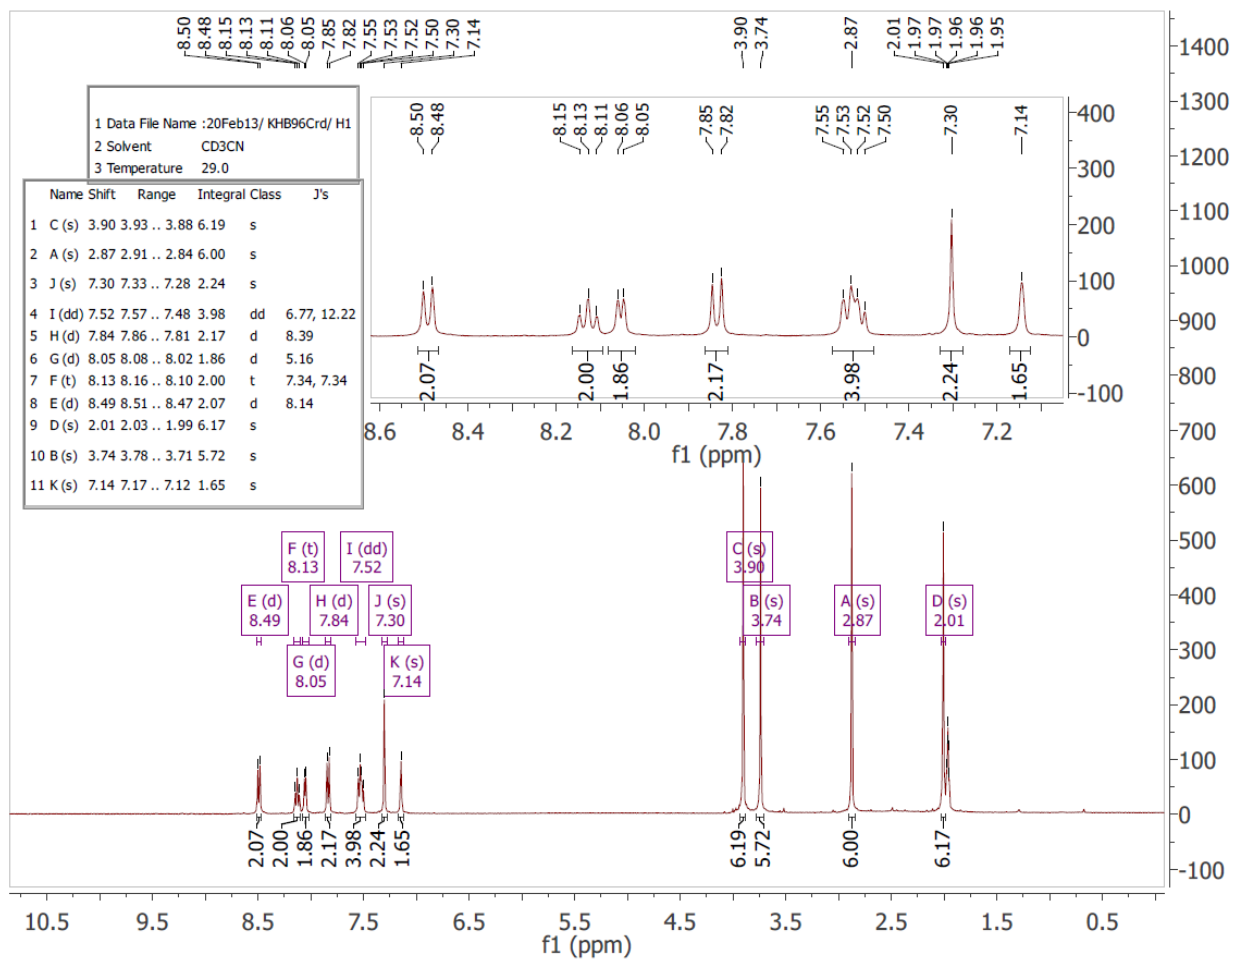

Figure S19.  $^1\text{H}$  NMR spectrum of  $[\text{Ir}(\text{3,4,5-tMeOppy})_2(\text{bpy})](\text{PF}_6)$  **4a** in  $\text{CD}_3\text{CN}$

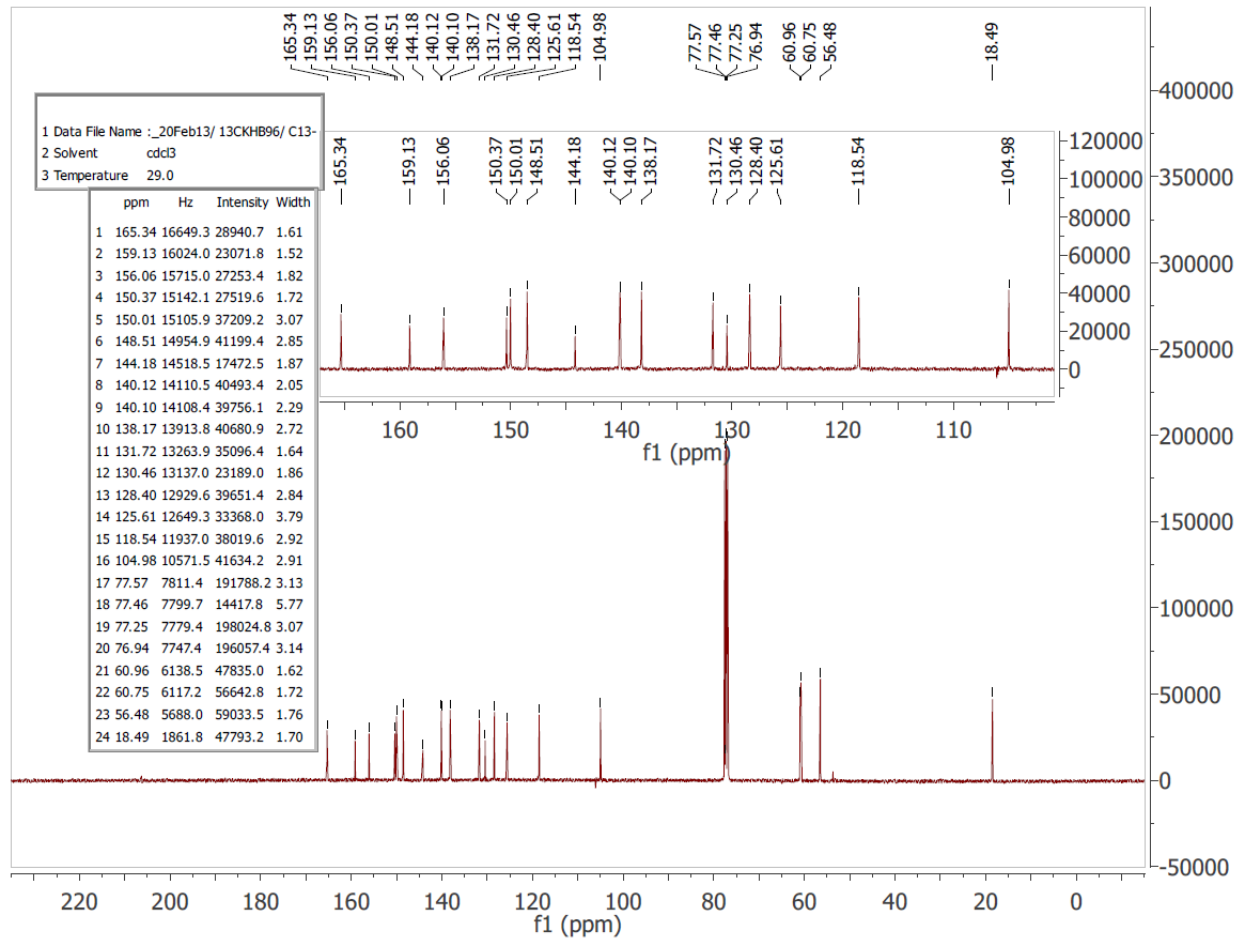

Figure S20.  $^{13}\text{C}$  NMR spectrum of  $[\text{Ir}(\text{3,4,5-tMeOppy})_2(\text{bpy})](\text{PF}_6)$  4a in  $\text{CDCl}_3$

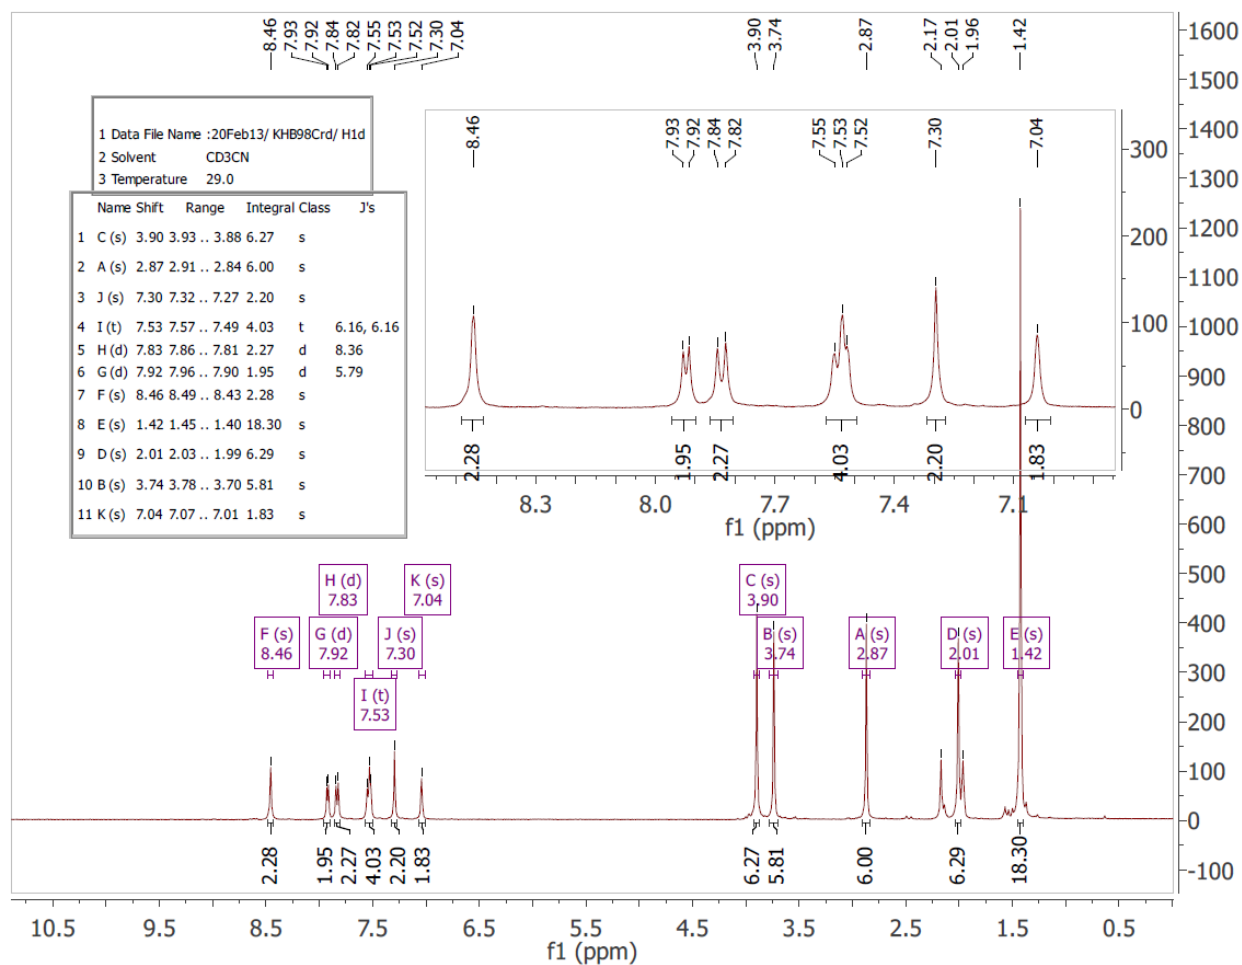

Figure S21.  $^1\text{H}$  NMR spectrum of  $[\text{Ir}(\text{3,4,5-tMeOppy})_2(\text{dzbubpy})](\text{PF}_6)$  **4b** in  $\text{CD}_3\text{CN}$

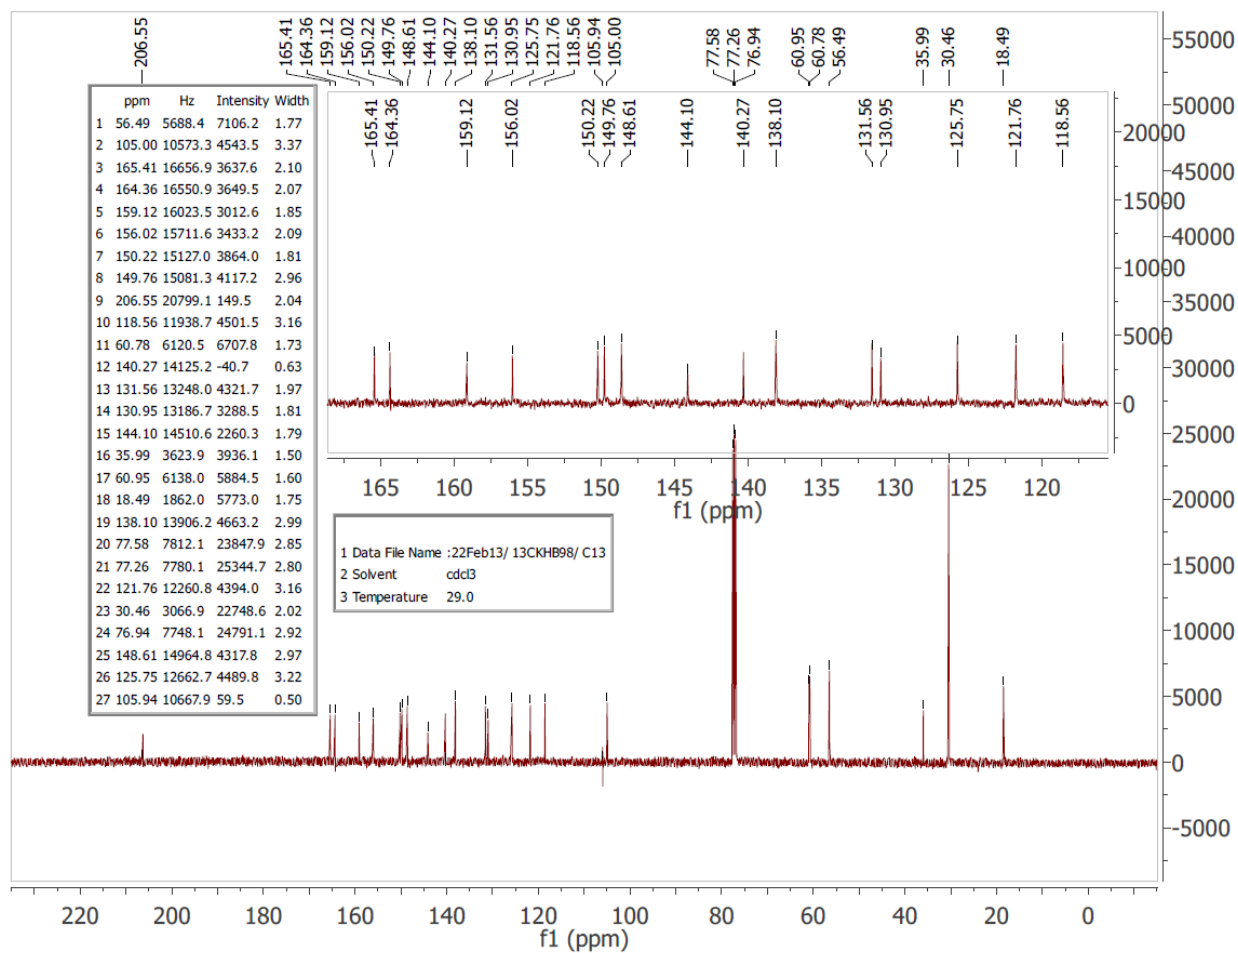

Figure S22.  $^{13}\text{C}$  NMR spectrum of  $[\text{Ir}(\text{3,4,5-tMeOppy})_2(\text{dtbbupy})](\text{PF}_6)$  **4b** in  $\text{CDCl}_3$

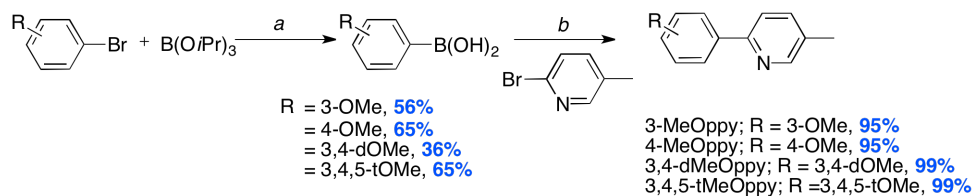

Figure S23. Synthesis of C<sup>N</sup> ligands. Reagents and conditions: <sup>a</sup> i. toluene/THF (4:1 v/v), 1.2 equiv. *n*-BuLi, -78 °C, N<sub>2</sub>; ii. 1 N HCl, -20 °C, RT, 0.5 h. <sup>b</sup> 1,4-dioxane/H<sub>2</sub>O (4:1 v/v), 3.0 equiv. K<sub>2</sub>CO<sub>3</sub>, 5 mol% Pd(PPh<sub>3</sub>)<sub>4</sub>, N<sub>2</sub>, 105 °C, 19 h.

Table S1. Relevant electrochemical data for complexes **1a-4b**.<sup>a</sup>

| complex   | ligands        |                | $E_{1/2,ox}$      | $\Delta E_p$ | $E_{1/2,red}$ | $\Delta E_p$ | $\Delta E$ |
|-----------|----------------|----------------|-------------------|--------------|---------------|--------------|------------|
|           | C <sup>N</sup> | N <sup>N</sup> | V                 | mV           | V             | mV           | V          |
| <b>1a</b> | 3-MeOppy       | bpy            | 0.95              | 76           | -1.40         | 69           | 2.38       |
| <b>1b</b> | 3-MeOppy       | dtBubpy        | 0.90              | 75           | -1.52         | 70           | 2.49       |
| <b>2a</b> | 4-MeOppy       | bpy            | 1.15 <sup>b</sup> | -            | -1.42         | 70           | 2.61       |
| <b>2b</b> | 4-MeOppy       | dtBubpy        | 1.13 <sup>b</sup> | -            | -1.49         | 70           | 2.63       |
| <b>3a</b> | 3,4-dMeOppy    | bpy            | 0.84              | 75           | -1.41         | 71           | 2.27       |
| <b>3b</b> | 3,4-dMeOppy    | dtBubpy        | 0.78              | 69           | -1.52         | 67           | 2.35       |
| <b>4a</b> | 3,4,5-tMeOppy  | bpy            | 0.87              | 75           | -1.40         | 74           | 2.30       |
| <b>4b</b> | 3,4,5-tMeOppy  | dtBubpy        | 0.84              | 76           | -1.50         | 70           | 2.42       |

<sup>a</sup> CV traces recorded in MeCN solution with 0.1 M (*n*-Bu<sub>4</sub>N)PF<sub>6</sub> at 298 K at 50 mVs<sup>-1</sup>. Values are in V vs. SCE (Fc/Fc<sup>+</sup> vs. SCE = 0.38 V).<sup>1</sup> A non-aqueous Ag/Ag<sup>+</sup> electrode (silver wire in a solution of 0.1 M AgNO<sub>3</sub> in MeCN) was used as the pseudoreference electrode; a glassy-carbon electrode was used for the working electrode and a Pt electrode was used as the counter electrode. <sup>b</sup> Irreversible and  $E_{pa}$  reported for oxidation peak potentials.



Table S2. Relevant spectroscopic data for complex **1a-4b**.

| Complex   | $\lambda_{\text{abs}} / \text{nm} (\epsilon / 10^4 \text{ M}^{-1} \text{ cm}^{-1})^a$ | $E_{0,0}$ (nm) |
|-----------|---------------------------------------------------------------------------------------|----------------|
| <b>1a</b> | 265 (8.37), 311 (3.14), 338 (1.61), 425 (0.70)                                        | 498            |
| <b>1b</b> | 263 (10.61), 308 (4.18), 338 (2.09), 425(0.80)                                        | 492            |
| <b>2a</b> | 255 (5.32), 277 (6.78), 309 (3.71), 390 (0.86), 450* (0.11)                           | 464            |
| <b>2b</b> | 250 (6.62), 278 (8.88), 310 (3.75), 390 (0.82), 450* (0.09)                           | 471            |
| <b>3a</b> | 279 (5.72), 308 (2.47), 340 (1.57), 419 (0.74)                                        | 472            |
| <b>3b</b> | 279 (6.76), 312 (2.75), 343 (1.78), 424 (0.78)                                        | 480            |
| <b>4a</b> | 244 (6.22), 275 (6.68), 310 (4.21), 330 (2.72), 385 (0.93)                            | 460            |
| <b>4b</b> | 248 (8.81), 275 (9.45), 310 (5.89), 331 (3.76), 395 (1.14)                            | 473            |

<sup>a</sup> Absorption spectra recorded in aerated MeCN at 298 K. Molar absorptivities ( $\epsilon$ ) determined over a concentration range of  $6.88 \times 10^{-1}$  to  $3.19 \times 10^2 \mu\text{M}$  wherein absorbance values obey the Beer-Lambert law. <sup>b</sup>  $E_{0,0}$  was estimated from the onset of the absorption spectrum at approximately 10% intensity. \* Shoulder.

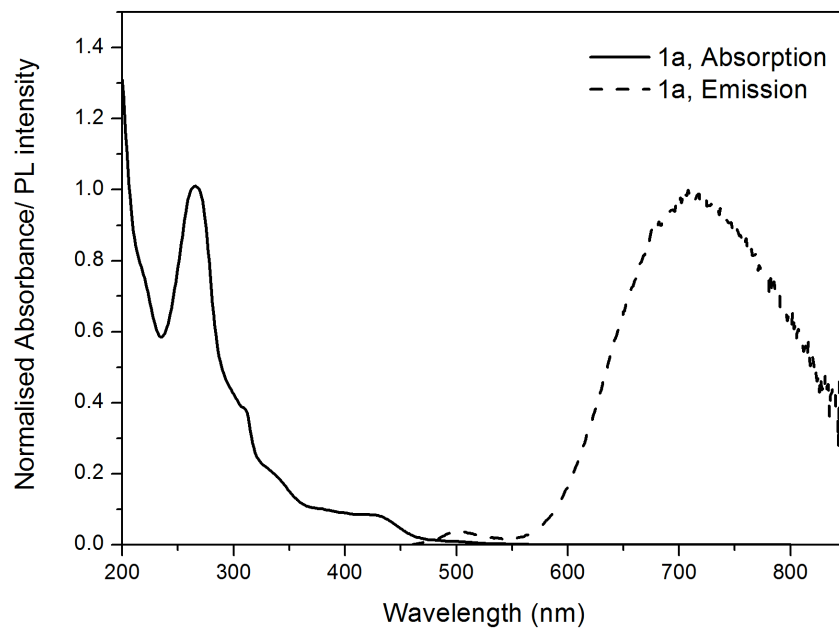

Figure S23. Normalized absorption and emission spectra of  $[\text{Ir}(\text{3-MeOppy})_2(\text{bpy})](\text{PF}_6)$  **1a** recorded in MeCN at 298 K

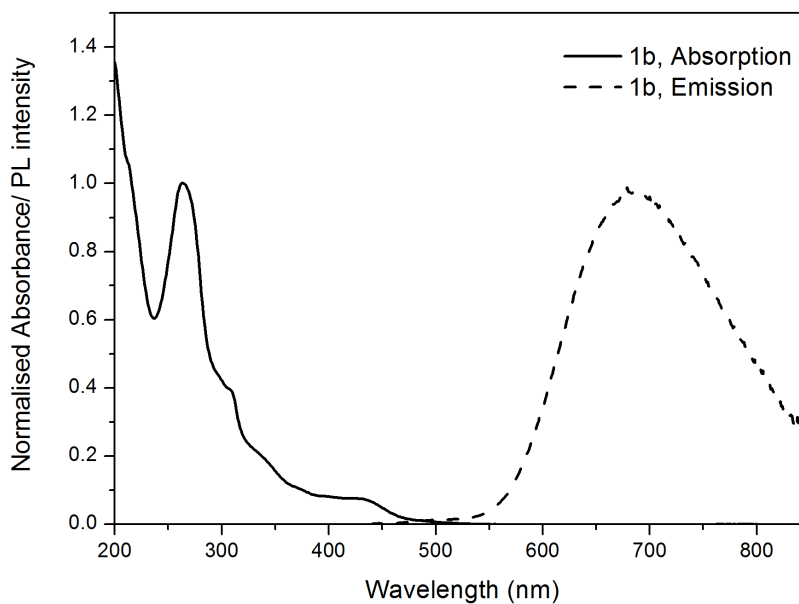

Figure S24. Normalized absorption and emission spectra of  $[\text{Ir}(\text{3-MeO-ppy})_2(\text{dzbbpy})](\text{PF}_6)$  **1b** recorded in MeCN at 298 K

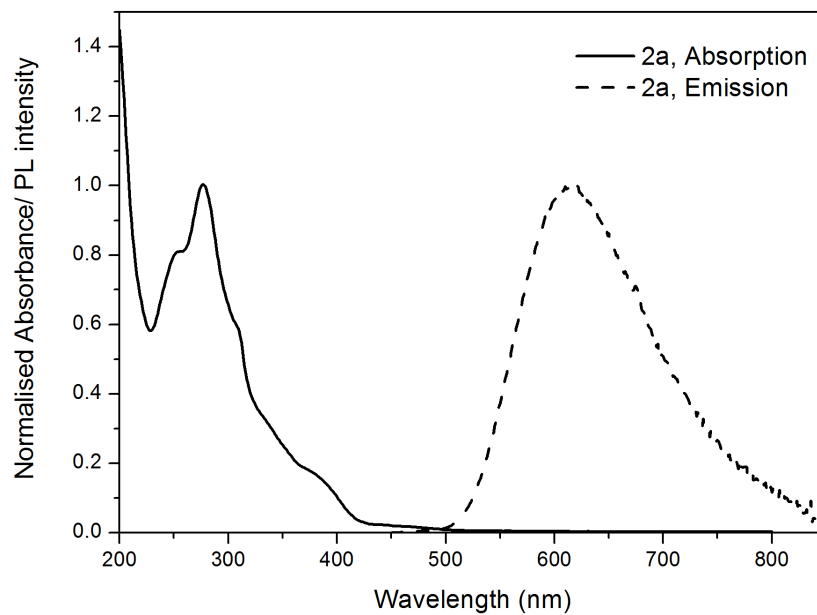

Figure S25. Normalized absorption and emission spectra of  $[\text{Ir}(\text{4-MeOppy})_2(\text{bpy})](\text{PF}_6)$  2a recorded in MeCN at 298 K

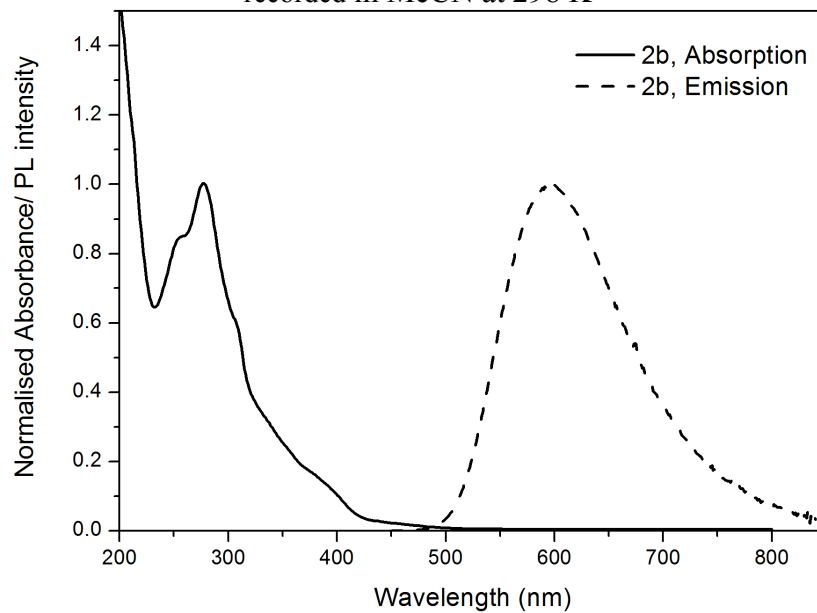

Figure S26. Normalized absorption and emission spectra of  $[\text{Ir}(\text{4-MeOppy})_2(\text{dtbbpy})](\text{PF}_6)$  2b recorded in MeCN at 298 K

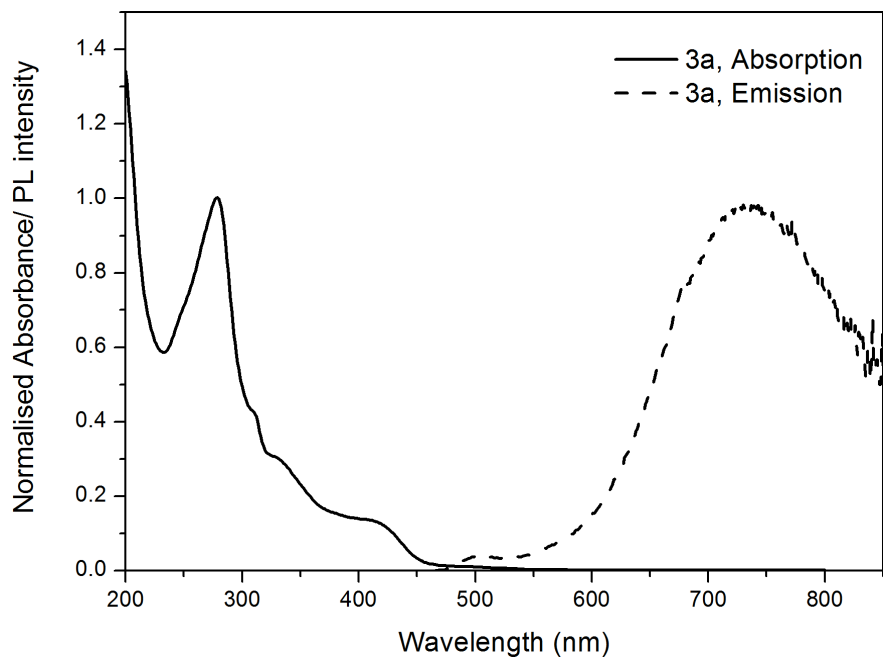

Figure S27. Normalized absorption and emission spectra of  $[\text{Ir}(\text{3,4-dMeOppy})_2(\text{bpy})](\text{PF}_6)$  3a recorded in MeCN at 298 K

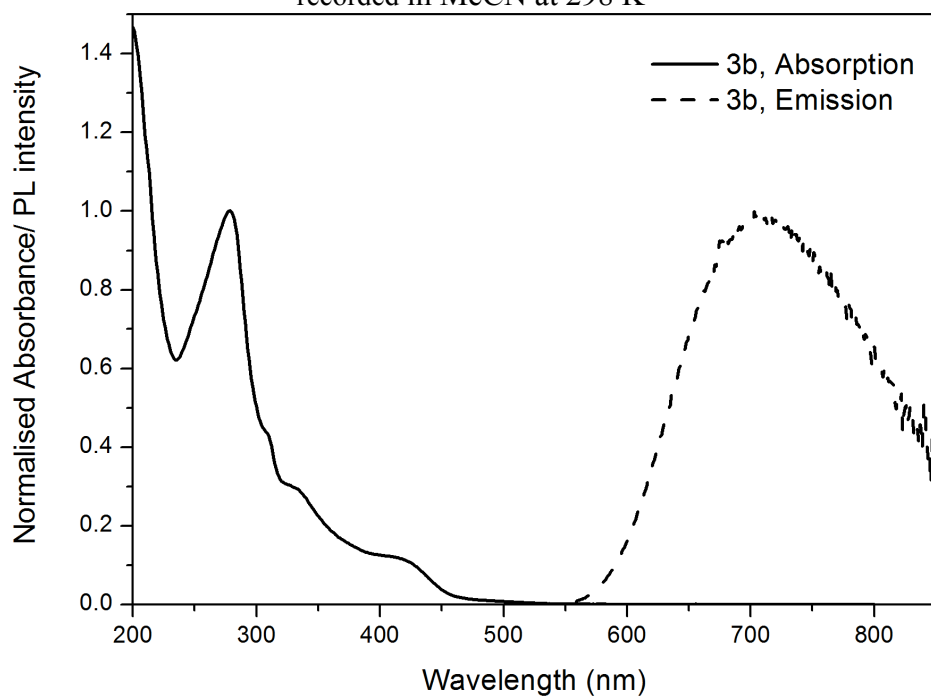

Figure S28. Normalized absorption and emission spectra  $[\text{Ir}(\text{3,4-dMeOppy})_2(\text{dtbbupy})](\text{PF}_6)$  3b recorded in MeCN at 298 K

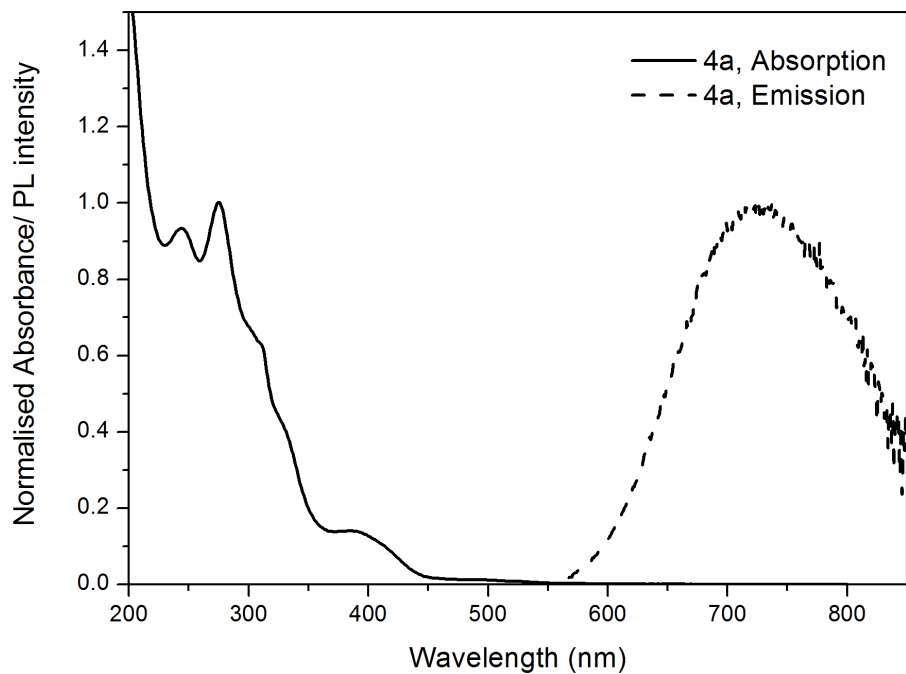

Figure S29. Normalized absorption and emission spectra of  $[\text{Ir}(3,4,5\text{-tMeOppy})_2(\text{bpy})](\text{PF}_6)$  **4a** recorded in MeCN at 298 K

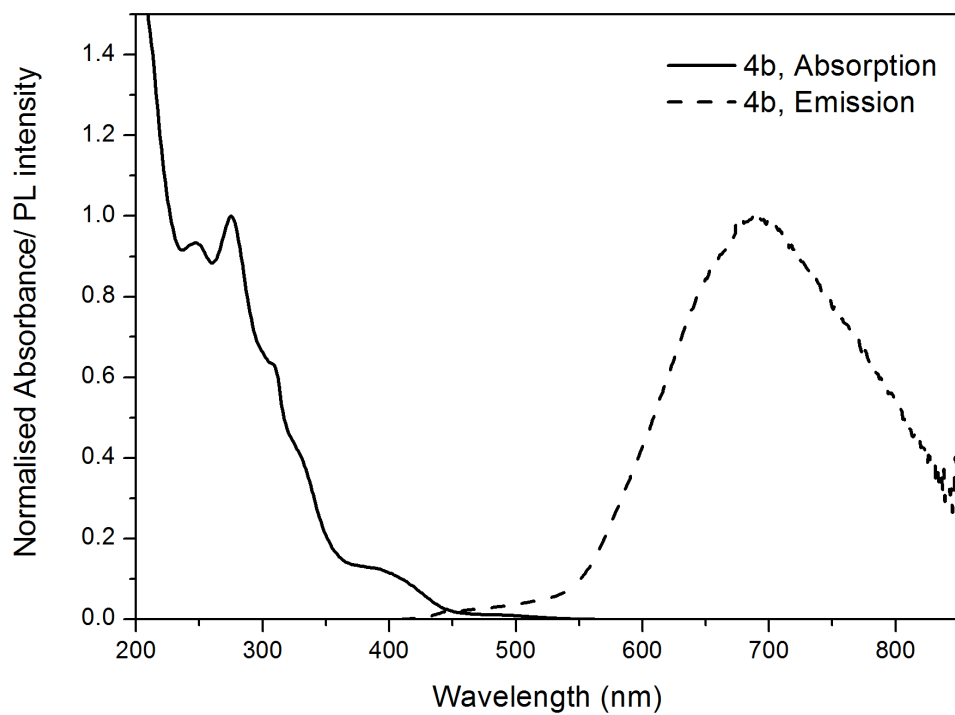

Figure S30. Normalized absorption and emission spectra of  $[\text{Ir}(3,4,5\text{-tMeOppy})_2(\text{dtbbpy})](\text{PF}_6)$  **4b** recorded in MeCN at 298 K

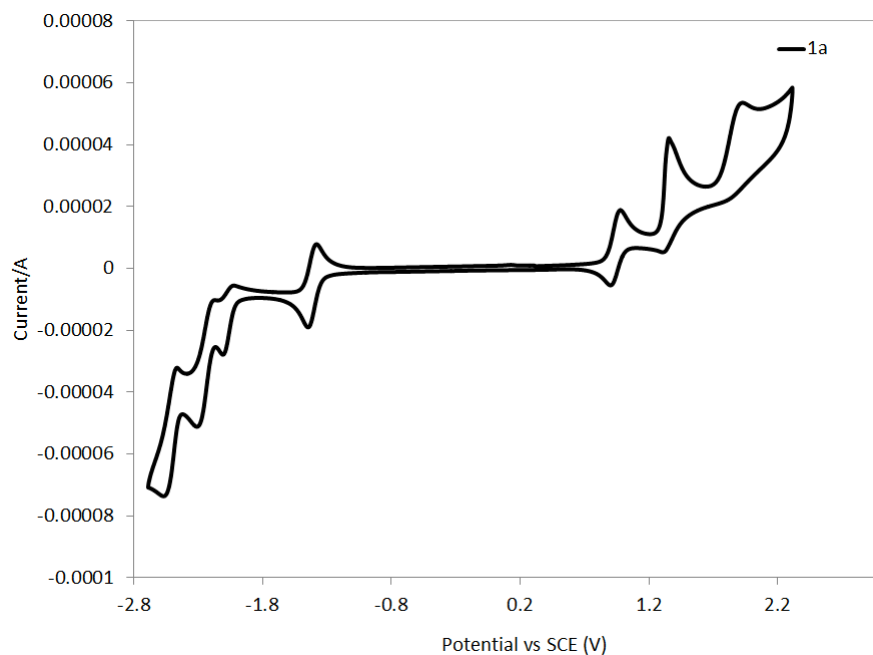

Figure S31. Cyclic voltammogram of  $[\text{Ir}(\text{3-MeOppy})_2(\text{bpy})](\text{PF}_6)$  **1a** recorded at 298 K at 50 mV/s in MeCN with 0.1 M  $(n\text{Bu}_4\text{N})\text{PF}_6$

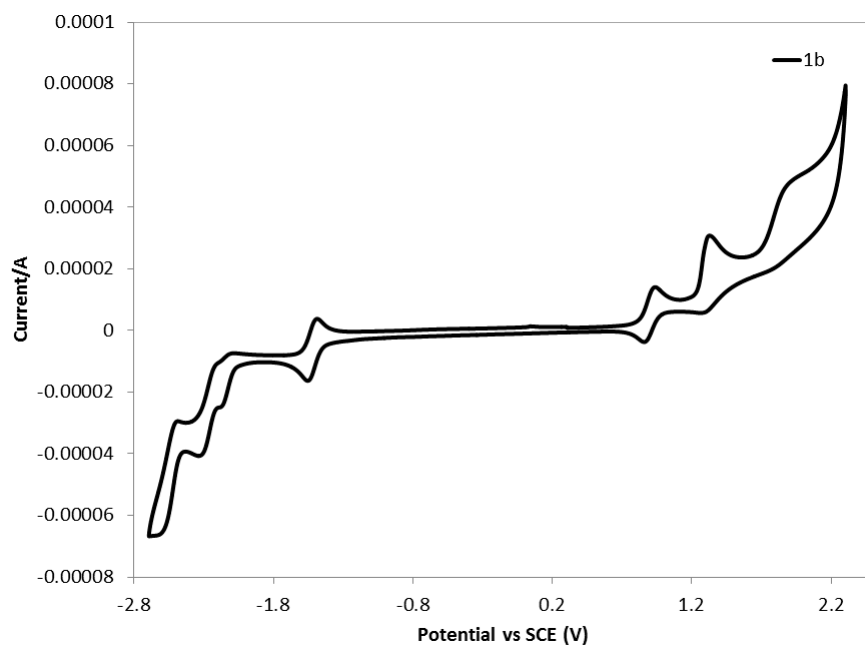

Figure S32. Cyclic voltammogram of  $[\text{Ir}(\text{3-MeO-ppy})_2(\text{dtbbupy})](\text{PF}_6)$  **1b** recorded at 298 K at 50 mV/s in MeCN with 0.1 M  $(n\text{Bu}_4\text{N})\text{PF}_6$

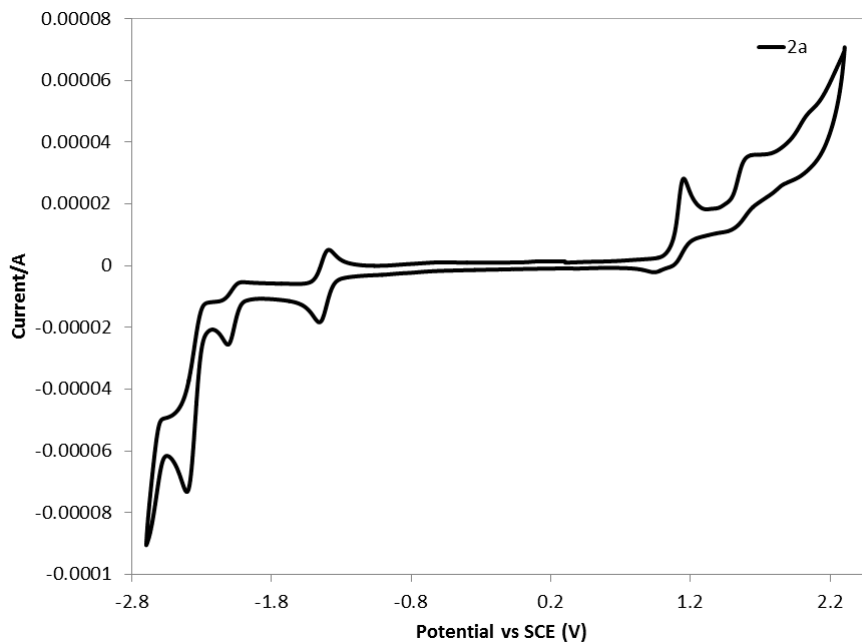

Figure S33. Cyclic voltammogram of  $[\text{Ir}(\text{4-MeOppy})_2(\text{bpy})](\text{PF}_6)$  **2a** recorded at 298 K at 50 mV/s in MeCN with 0.1 M ( $n\text{Bu}_4\text{N}$ ) $\text{PF}_6$

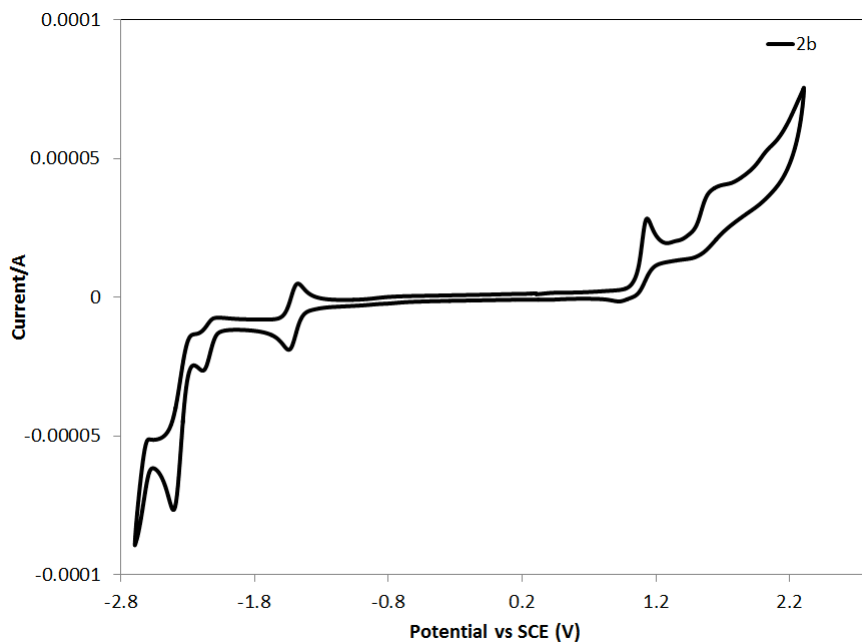

Figure S34. Cyclic voltammogram of  $[\text{Ir}(\text{4-MeOppy})_2(\text{dtubpy})](\text{PF}_6)$  **2b** recorded at 298 K at 50 mV/s in MeCN with 0.1 M ( $n\text{Bu}_4\text{N}$ ) $\text{PF}_6$

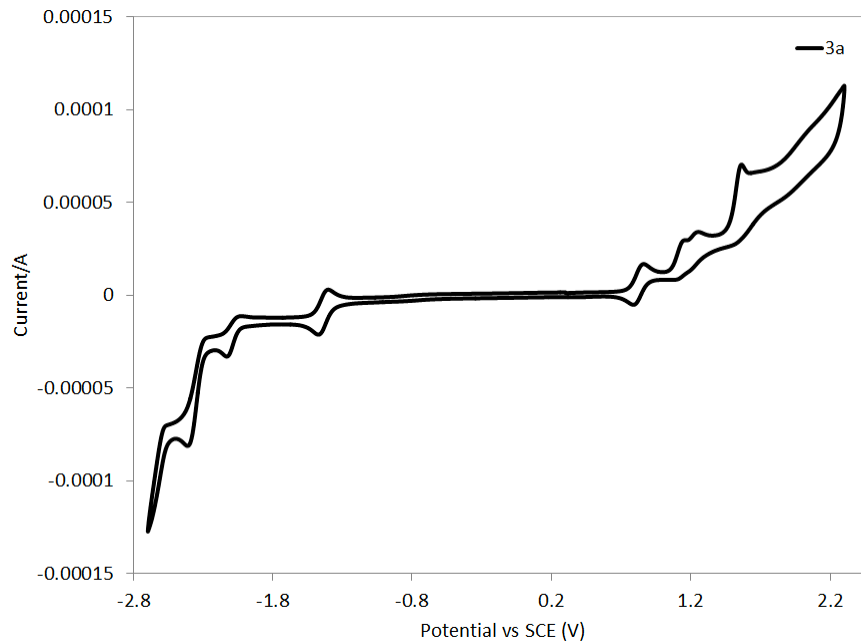

Figure S35. Cyclic voltammogram of  $[\text{Ir}(\text{3,4-dMeOppy})_2(\text{bpy})](\text{PF}_6)$  **3a** recorded at 298 K at 50 mV/s in MeCN with 0.1 M ( $n\text{Bu}_4\text{N}$ ) $\text{PF}_6$

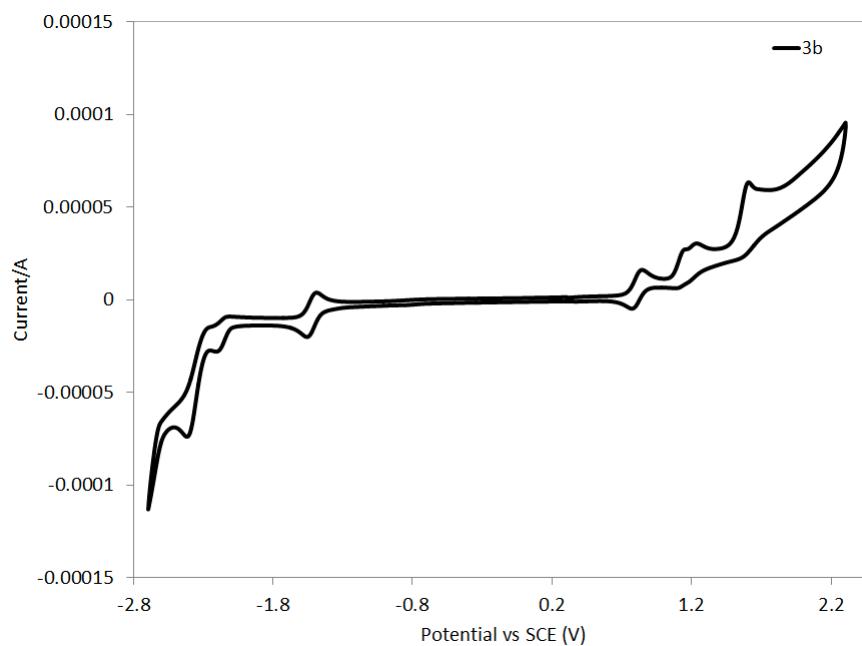

Figure S36. Cyclic voltammogram of  $[\text{Ir}(\text{3,4-dMeOppy})_2(\text{dtubppy})](\text{PF}_6)$  **3b** recorded at 298 K at 50 mV/s in MeCN with 0.1 M ( $n\text{Bu}_4\text{N}$ ) $\text{PF}_6$



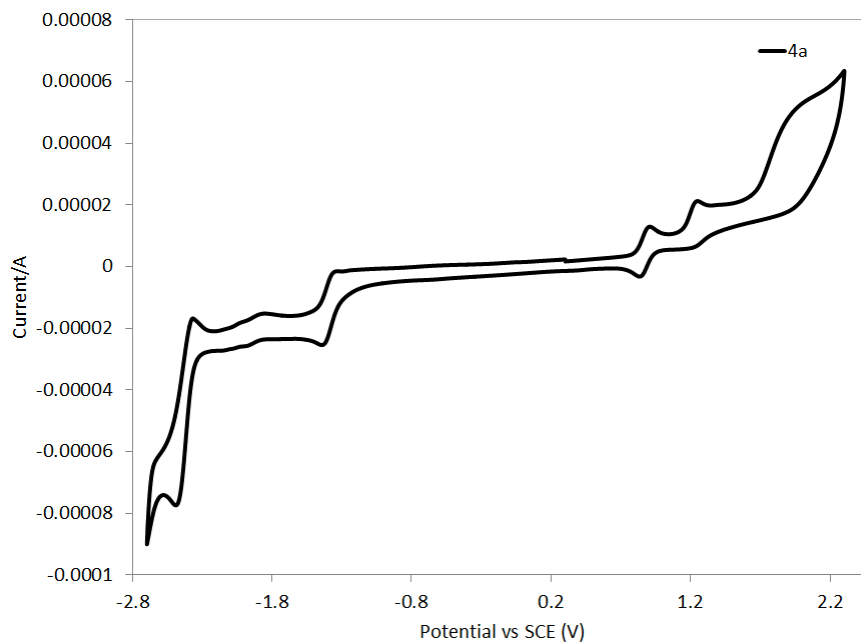

Figure S37. Cyclic voltammogram of  $[\text{Ir}(\text{3,4,5-tMeOppy})_2(\text{bpy})](\text{PF}_6)$  **4a** recorded at 298 K at 50 mV/s in MeCN with 0.1 M ( $n\text{Bu}_4\text{N}$ ) $\text{PF}_6$

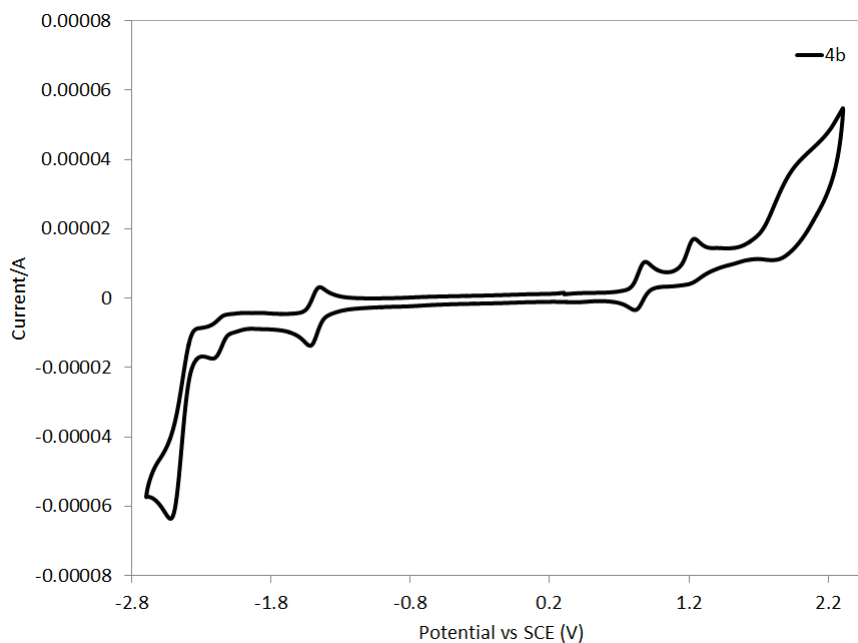

Figure S38. Cyclic voltammogram of  $[\text{Ir}(\text{3,4,5-tMeOppy})_2(\text{dtbubpy})](\text{PF}_6)$  **4b** recorded at 298 K at 50 mV/s in MeCN with 0.1 M ( $n\text{Bu}_4\text{N}$ ) $\text{PF}_6$

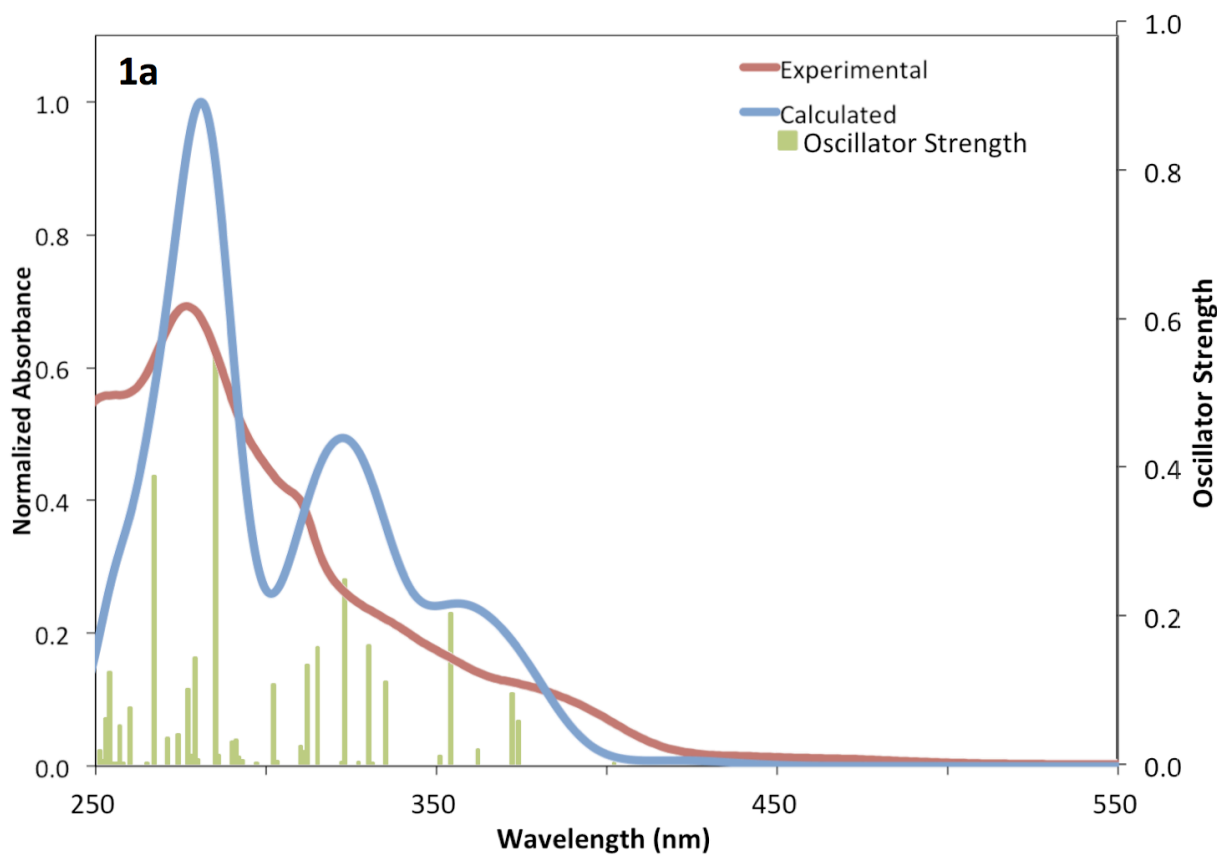

Figure S39. Experimental (red) and calculated UV-Vis spectrum (blue – fwhm =  $1000\text{ cm}^{-1}$ ) obtained from TDDFT calculations with the corresponding vertical excitations (green) for **1a**.

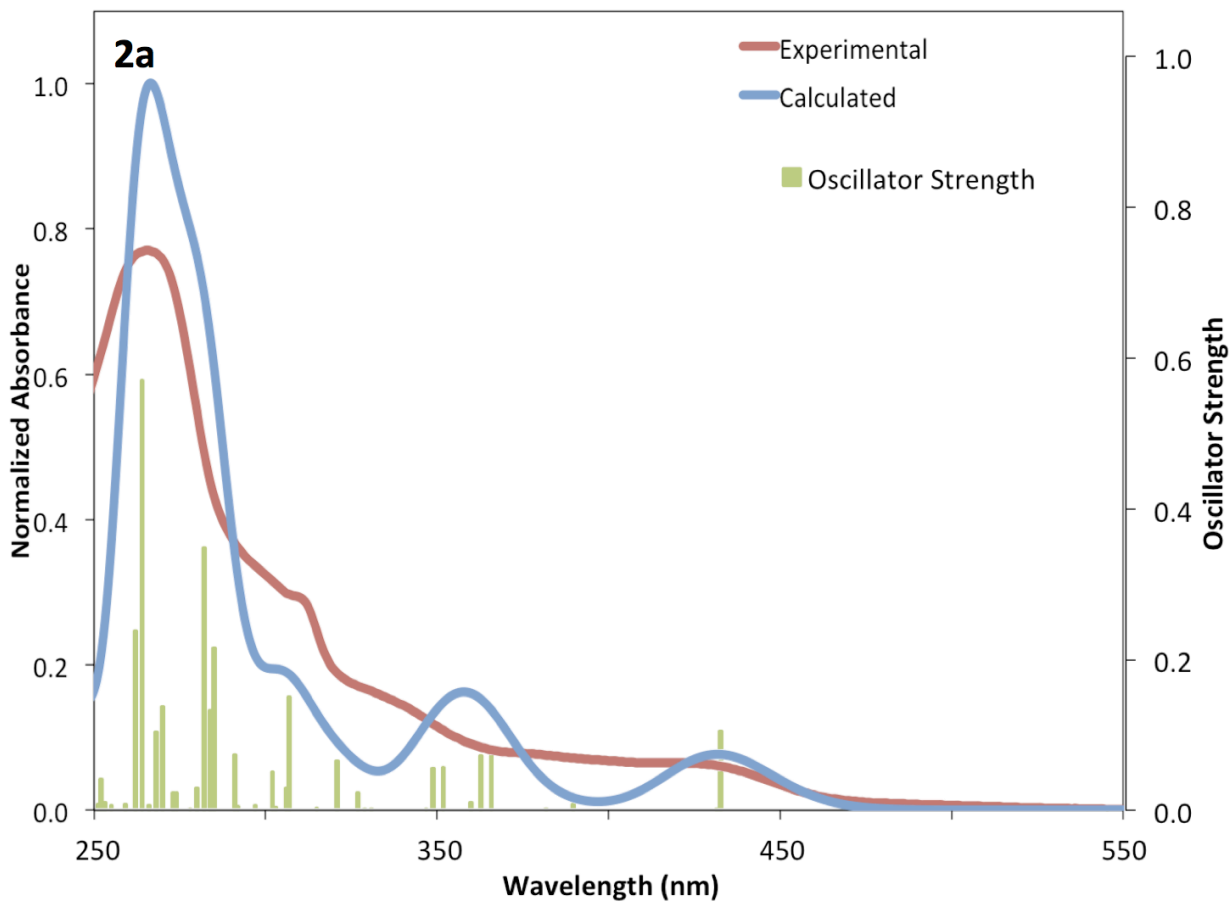

Figure S40. Experimental (red) and calculated UV-Vis spectrum (blue – fwhm = 1000 cm<sup>-1</sup>) obtained from TDDFT calculations with the corresponding vertical excitations (green) for **2a**.

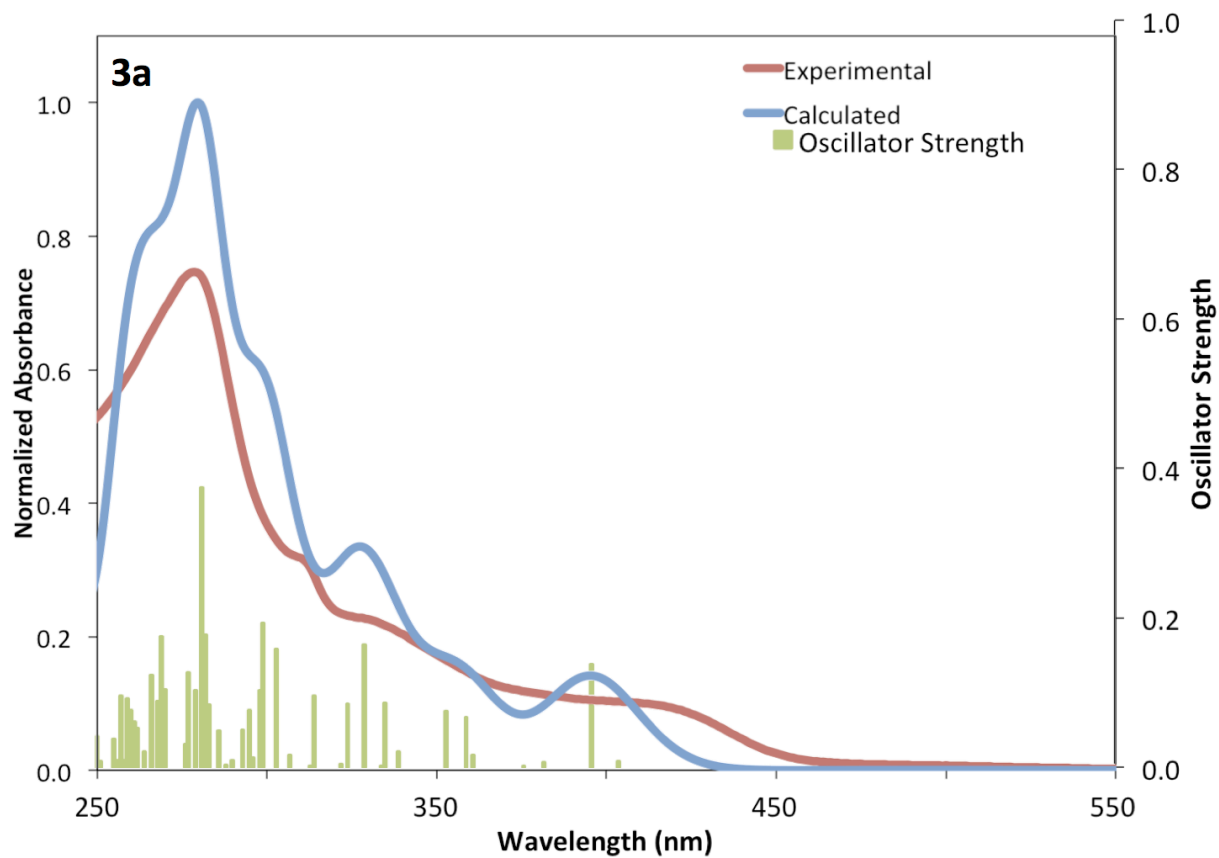

Figure S41. Experimental (red) and calculated UV-Vis spectrum (blue – fwhm =  $1000\text{ cm}^{-1}$ ) obtained from TDDFT calculations with the corresponding vertical excitations (green) for **3a**.

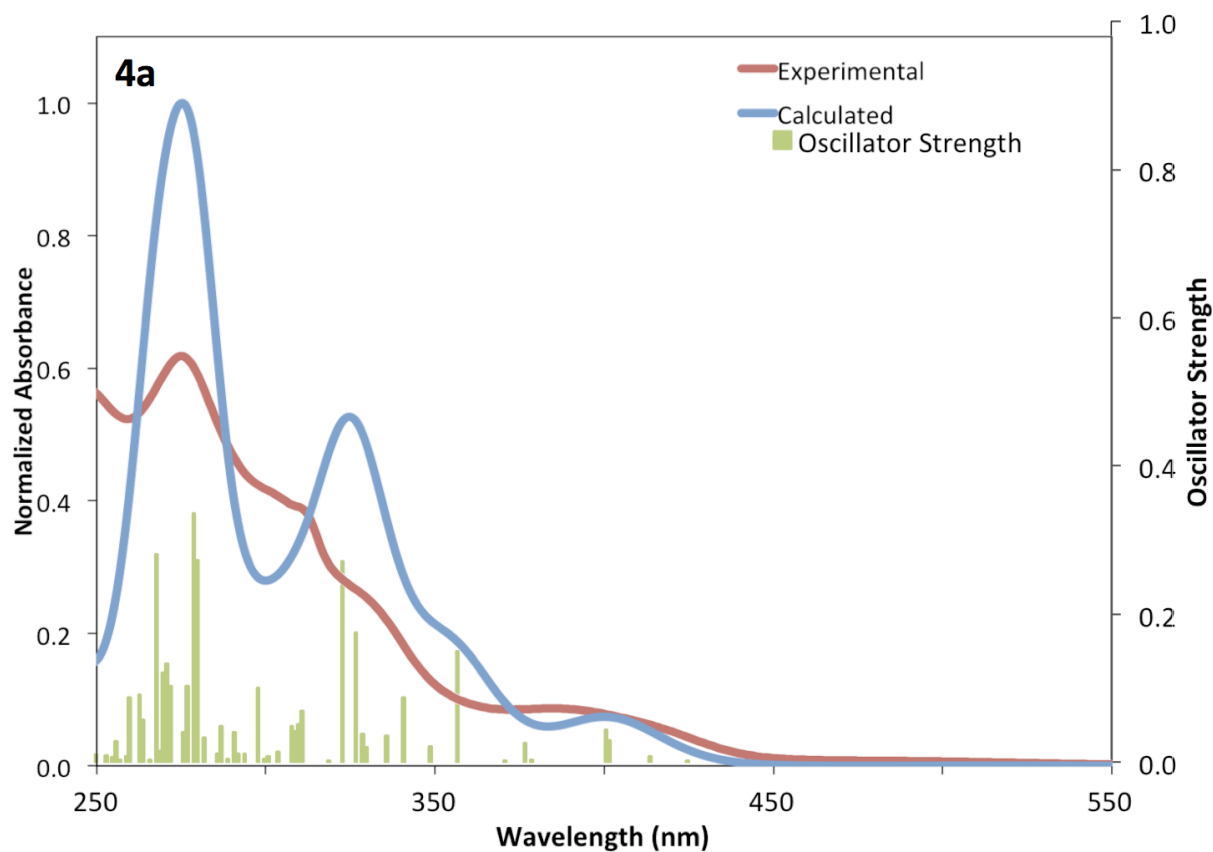

Figure S42. Experimental (red) and calculated UV-Vis spectrum (blue – fwhm =  $1000\text{ cm}^{-1}$ ) obtained from TDDFT calculations with the corresponding vertical excitations (green) for **4a**.

**Table S3.** Triplet state energies obtained by TDDFT.

|           | State | $\lambda$ /nm | E/eV | Assignment [ <i>f</i> ] | Nature                        |
|-----------|-------|---------------|------|-------------------------|-------------------------------|
| <b>1a</b> | $T_1$ | 550.7         | 2.25 | H→L (98%) [0]           | $^3\text{MLCT}/^3\text{LLCT}$ |
| <b>1b</b> | $T_1$ | 513.4         | 2.41 | H→L (98%) [0]           | $^3\text{MLCT}/^3\text{LLCT}$ |
| <b>2a</b> | $T_1$ | 483.8         | 2.56 | H→L (91%) [0]           | $^3\text{MLCT}/^3\text{LLCT}$ |
| <b>2b</b> | $T_1$ | 454.7         | 2.73 | H→L (91%) [0]           | $^3\text{MLCT}/^3\text{LLCT}$ |
| <b>3a</b> | $T_1$ | 499.6         | 2.48 | H→L (97%) [0]           | $^3\text{MLCT}/^3\text{LLCT}$ |

|           |       |       |      |           |                               |
|-----------|-------|-------|------|-----------|-------------------------------|
| <b>3b</b> | $T_1$ | 469.0 | 2.64 | H→L (97%) | $^3\text{MLCT}/^3\text{LLCT}$ |
| <b>4a</b> | $T_1$ | 524.1 | 2.37 | H→L (97%) | $^3\text{MLCT}/^3\text{LLCT}$ |
| <b>4b</b> | $T_1$ | 491.0 | 2.53 | H→L (97%) | $^3\text{MLCT}/^3\text{LLCT}$ |

The most important parameters for the **1b** - **4b** based LEECs are shown in Table S4. The molecule **1a** did not work correctly and no electroluminescence data can be provided.

**Table S4.** Performance of LEEC devices driven at a constant voltage of 4V.

|           | $t_{\text{max}}$<br>(s) <sup>a</sup> | Luminance <sub>max</sub><br>(cd m <sup>-2</sup> ) | $t_{1/2}$<br>(s) <sup>b</sup> | Efficacy<br>(cd A <sup>-1</sup> ) | Power Efficiency<br>(lm W <sup>-1</sup> ) | EQE<br>(%) <sup>c</sup> | CIE <sub>x,y</sub> |
|-----------|--------------------------------------|---------------------------------------------------|-------------------------------|-----------------------------------|-------------------------------------------|-------------------------|--------------------|
| <b>1a</b> | -                                    | -                                                 | -                             | -                                 | -                                         | -                       | -                  |
| <b>1b</b> | 17                                   | 7.4                                               | 60                            | $6.7 \cdot 10^{-4}$               | 0.037                                     | 0.0005                  | 0.56, 0.44         |
| <b>2a</b> | 3                                    | 53.1                                              | 30                            | $38 \cdot 10^{-4}$                | 0.0144                                    | 0.002                   | 0.49, 0.50         |
| <b>2b</b> | 7                                    | 4.6                                               | 42.7                          | $6.3 \cdot 10^{-4}$               | 0.0004                                    | 0.0003                  | 0.46, 0.52         |
| <b>3a</b> | 30                                   | 3.3                                               | 100                           | $4.5 \cdot 10^{-4}$               | 0.0002                                    | 0.0004                  | 0.56, 0.44         |
| <b>3b</b> | 14                                   | 7.34                                              | 233                           | $8.6 \cdot 10^{-4}$               | 0.0005                                    | 0.001                   | 0.57, 0.43         |
| <b>4a</b> | 8h                                   | 21                                                | 16h                           | 0.029                             | 0.007                                     | 0.034                   | 0.63, 0.37         |
| <b>4b</b> | 1.1h                                 | 18                                                | 2h                            | 0.050                             | 0.013                                     | 0.050                   | 0.61, 0.38         |

<sup>a</sup> Defined as the time to reach the peak luminance. <sup>b</sup> Time to reach half of the maximum luminance. <sup>c</sup> External Quantum Efficiency.

## References

- 1 Pavlishchuk, V. V. & Addison, A. W. Conversion constants for redox potentials measured versus different reference electrodes in acetonitrile solutions at 25°C. *Inorg. Chim. Acta* **298**, 97-102, doi:10.1016/s0020-1693(99)00407-7 (2000).
